# Supplementary material for: Spatially resolved analysis of the T cell immune contexture in lung cancer-associated brain metastases
Source: HighWire-hosted journal article supplement (doi:10.1136/jitc-2021-002684), 2021-10-01
Supplement: jitc-2021-002684supp001_data_supplement.xlsx [file jitc-2021-002684supp001_data_supplement.xlsx]

## Sheet: Suppl 1
Supplementary Data 1 - Clinical Characteristics
Patient_Identifiers	Sex (0=M, 1=F)	Smoking_status (0=never, 1=current, 2=former, 3=unknown)	Pack_years	Age_at_initial_diagnosis	Stage_at_initial_dx (0 = Unknown, 1 = IA, 2 = IB, 3 = IIA, 4 = IIB, 5 = IIIA, 6 = IIIB, 7 = IV, 5 = N/A)	Subtype (0=adeno, 1=squamous, 2=Other NSCLC, 3=small cell, 4=other neuroendocrine)	Molecular_alterations (0=None, 1=KRAS, 2=EGFR, 3=ALK, 4=ROS1, 5=BRAF, 6=Other)	OS (days)	BrM OS (days)
1	1	0		57.32	6	0	3	1703	1542
2	0	1	22.5	60.49	5	0	NA	1318	140
3	1	2	20	56.68	7	0	NA	331	331
4	0	1	35	54.1	3	0	0	939	603
5	1	1	40	60.43	7	0	NA	1821	1821
6	0	2	80	66.61	7	4	NA	442	442
7	1	1	60	55.65	6	0	0	3606	1822
8	1	1	40	51.68	7	0	1	3332	3299
9	1	1	40	59.69	7	0	0	348	348
11	1	1	30	65.76	7	0	2	1509	1509
12	1	1	35	51.11	6	2	NA	1496	832
13	1	0		72.78	2	2	0	563	131
14	0	2	45	49.75	0	2	NA	1331	530
15	1	1	30	46.29	6	0	0	829	573
16	0	3		53.54	4	1	NA	565	363
17	1	2	40	66.09	7	0	1	258	258
18	0	2	15	53.92	8	3	NA	425	425
19	0	0		53.62	7	0	3	1201	1201
20	1	0		26.17	7	0	0	1852	1852
21	1	2	20	48.12	7	0	0	1018	224
22	1	1	40	64.37	7	0	0	230	230
23	1	0		66.83	7	0	2	472	467
24	0	1	45	61.32	5	0	NA	703	458
27	1	0		29.27	5	0	3	1390	1036
28	1	1	38	54.15	7	0	0	111	111
29	1	2	20	61.55	7	1	1	219	219
30	0	2	25	70.08	7	0	1	299	25
31	0	2	30	52.77	6	0	1	3943	2445
32	1	1	35	55.33	3	0	1	1408	1284
33	0	2	45	75.46	7	0	0	757	757
34	0	1	70	51.23	7	0		462	298
35	1	1	100	70.13	7	0	0	207	202
36	1	1	18	44.82	7	0	0	438	438
37	1	1	40	57.53	7	0	0	1294	1294
38	1	0		57.41	6	0	2	1418	802
48	1	1	70	75.7	2	0	0	1527	1293
49	1	1	15	34.11	7	2	0	232	232
50	1	2	40	56.17	7	0	0	923	923
51	1	1		70.22	7	0	0	3565	3565
52	0	1	60	58.24	7	3	0	294	294
53	1	1	40	55.1	1	0	2	3097	194
64	1	1	15	60.86	8	3	0	601	190
65	0	1	120	72.2	7	3	0	765	765
67	0	1	50	66.23	7	0	1	1452	1452
71	1	3	50	77.88	7	3	0	591	141
73	1	2	10	55.42	7	0	1	1283	1283
74	0	0		42.36	7	0	2	2482	2482
75	1	1	30	60.12	7	3	0	612	171
76	0	2	50	69.34	8	3	0	456	205
77	0	1	30	66.04	6	1	0	1144	718
79	0	1	160	61.75	7	2	0	316	316
84	0	3		68.09	0	0	0	1680	4
87	1	2	30	63.35	5	3	0	464	223
88	1	2	120	81.44	7	0	2	867	6
89	1	1	25	41.51	7	0	0	163	163
91	0	1	30	50.36	7	0	0	358	358
92	0	2		67.94	7	0	0	33	33
94	1	1	45	65.46	8	3	0	995	250
95	1	2	45	65.88	7	0	0	2428	2428
96	1	1	50	74.26	7	3	0	362	362
97	1	1	50	60.12	7	0	0	62	62
98	1	1	40	55.85	7	4	0	779	469
99	1	2	35	58.72	6	0	0	238	57
102	1	2	100	76.49	7	0	0	570	570
103	0	1	125	68.78	7	4	0	97	97
66	1	1	30	38.7	7	0	1	2736
68	0	2	30	62.31	6	0	0	498
CTRL 1	1	0		62.16	2	0	0	3157
CTRL 10	1	1		72.37	1	0	0	1123
CTRL 11	0	2	50	72.73	2	2	0	3463
CTRL 12	0	1	50	70.23	7	4	0	123
CTRL 13	0	1	45	64.77	6	1	0	3261
CTRL 14	1	0		74.85	2	0	0	4430
CTRL 15	1	0		68.7	2	0	0	3012
CTRL 16	0	2	20	68.09	1	0	0	2895
CTRL 17	0	2	80	66.09	7	0	0	135
CTRL 18	0	1	20	53.06	1	0	0	2542
CTRL 19	1	2	2.5	60.78	1	4	0	4167
CTRL 2	0	2	120	79.44	2	1	0	1585
CTRL 20	0	3		70.19	4	1	0	1006
CTRL 21	1	3		63.53	5	2	0	331
CTRL 22	1	2		56.38	4	0	0	2349
CTRL 23	1	2	15	80.89	1	1	0	3907
CTRL 24	1	1	100	64.69	1	1	0	1311
CTRL 25	0	1	90	60.14	1	1	0	2695
CTRL 26	0	1		72.56	3	0	0	523
CTRL 27	0	2	75	71.39	2	1	0	282
CTRL 28	0	2	26	68.22	1	1	0	2014
CTRL 3	0	2	3	63.98	1	0	0	2873
CTRL 4	1	1	15	83.01	4	0	0	83
CTRL 5	1	2	50	79.49	5	0	0	584
CTRL 6	1	0		67.35	1	2	0	2022
CTRL 7	1	1	50	67.52	2	0	0	2543
CTRL 8	1	1	60	62.15	2	4	0	25
CTRL 9	0	0		80.4	5	0	0	772

## Sheet: Suppl 2
Supplementary Data 2 - Tissue Characteristics (per patient)								IHC											H&E					QIF
Patient_Identifiers	Tissue obtained date	Tissue_site1 (0=brain, 1=lung primary, 2=lung metastasis, 3=node, 4=liver, 5=other)	Subtype (0=adeno, 1=squamous, 2=Other NSCLC, 3=small cell, 4=other neuroendocrine)	XRT_at_site_before_tissue_obtained (0=N, 1=Y)	Chemo_Targeted_tx_before_tissue_obtained (0=N, 1=Y)	Immunotherapy_before_tissue_obtained (0=N, 1=Y)	Any_pretreatment (0=N, 1=Y)	Tumor PDL1 TPS1	Tumor PDL1 TPS2	Tumor PDL1 TPS3	Tumor PDL1 TPS4	Tumor PDL1 TPS avg	Tumor PDL1 median	Stromal PDL1 SPS1	Stromal PDL1 SPS2	Stromal PDL1 SPS3	Stromal PDL1 SPS4	Stromal PDL1 TPS avg	TIL1	TIL2	TIL3	TIL4	Average TIL density	Tumor PDL1 avg	Stromal PDL1 avg	CD4	CD8	CD20	CD3	Granzyme_B_in_CD3	Ki67_in_CD3	Tumor Ki67	FOXP3 in CD4	Tim3 in CD3	Lag3 in CD3	PD1 in CD3
1	2013-02-06	0	0	1	0	0	1	100	90	100		96.6667	100	10				10	0	1	1		0.666667	1778.07	365.06	1661.83	15787.3	585.45	3332.24	887.96	867.23	758.41	382.83	624.6	197.63	2715.53
2	2012-02-22	0	0	0	0	0	0	0	0	0		0	0	0	0	0		0	0	3	0		1	75.83	53.6	1692.33	9257.16	496.81	845.96	229.77	556.79	842.35	136.99	381.42	142.74	1767.65
3	2009-11-19	0	0	0	0	0	0	0	0			0	0	0	0			0	1	1			1	155.31	123.12	233.69	1977.93	121.58	684.35	112.6	291.74	1111.18	96.16	693.48	111.3	935.73
4	2011-08-18	0	0	1	0	0	1	0				0	0	1				1	1				1	315.71	198.08	13491.3	29052	1299.54	10354.8	544.47	851.19	662.48	264.57	614	212.55	4288.26
5	2006-08-09	0	0	0	0	0	0	0	0	0		0	0	0	0	1		0.333333	1	1	0		0.666667	144.5	134.73	1222.17	4840.46	420.88	4377.64	446.49	451.05	199.97	210.3	917.44	203.43	1389.92
6	2010-06-22	0	4	0	0	0	0	0	0	0		0	0	0	0	0		0	0	1	1		0.666667	130.39	93.61	342.75	1042.4	101.99	1403.67	297.64	872.9	1978.8	67.05	360.87	143.7	945.22
7	2010-02-18	0	0	0	0	0	0	0	0	0		0	0	0	0	1		0.333333	1	1	1		1	97.59	100.22	1275.55	4268.12	249.06	2399.32	226.94	363.24	711.33	85.95	435.13	183.1	1414.06
8	2013-05-22	0	0	1	1	0	1	0	0	0		0	0	20	5	0		8.33333	0	1	0		0.333333	205.37	410.27	1947.57	11306.3	337.13	11560.6	574.83	1000.85	1530.36	207.51	522.29	198.74	1603.36
9	2011-06-14	0	0	0	0	0	0	10	5	1		5.33333	5	0	1	1		0.666667	2	1	1		1.33333	214.46	144.4	3745.72	11789	602.24	10544.8	296.46	356.17	571.54	500.51	734.53	183.58	1929.69
11	2013-01-26	0	0	0	0	0	0	5	1	1		2.33333	1	10	20	50		26.6667	2	1	1		1.33333	333.21	418.9	8815.36	20899.1	969.17	26564.7	483.67	653.67	528.98	644.23	1480.38	278.64	3643.04
12	2010-04-07	0	2	1	1	0	1	0	0			0	0	0	0			0	1				1	103.47	101.99	735.04	3358.89	188.29	1588.99	437.68	143.75	184.56	81.56	328.49	110.98	602.85
13	2011-01-26	0	2	0	0	0	0	0	0	0		0	0	0	1	1		0.666667	0	0			0	113.04	96.05	3966.68	16163.9	513.71	1353.57	179.1	1227.12	991.11	228.79	901.05	229.4	4451.25
14	2011-11-30	0	2	0	0	0	0	0	1			0.5	0.5	0	1			0.5	1	1			1	167.53	145.28	585.76	14512.4	244.09	13370	498.18	211.02	175.92	92.5	819.81	186.83	1704.72
15	2012-09-12	0	0	1	0	0	1	100	100	100		100	100	10	1	50		20.3333	1	1	0		0.666667	668.77	189.36	702.08	9123.31	663.63	2183.63	674.07	579.84	493.8	202.56	450.5	97.77	893.58
16	2009-05-30	0	1	1	0	0	1	0	20			10	10	0	1			0.5	0				0	177.2	106.74	514.07	4283.86	276.82	1260.45	230.37	139.2	229.05	187.11	607.12	158.64	1097.24
17	2012-10-03	0	0	1	1	0	1	0	0			0	0	0	0			0	1	0			0.5	134.13	128.77	474.12	2670.79	318.97	1697.99	400.82	327.54	307.68	70.88	496.99	147.82	854.08
18	2012-07-13	0	3	1	1	0	1	0	0	0	0	0	0	0	0	1	0	0.25	0	0	1	0	0.25	148.2	94.85	1000.95	8063.24	484.8	1198.71	334.82	425.2	1951.33	119.5	147.26	122.48	838.32
19	2012-03-23	0	0	0	0	0	0	0	0			0	0	25	10			17.5	1	1			1	86.31	78.14	3427.6	31387.5	419.77	12696.7	703.49	1522.77	1993.72	309.39	650.98	256.41	2580.83
20	2007-11-13	0	0	0	0	0	0	0	0	0		0	0	0	0	0		0	1	1	1		1	122.17	115.88	1639.09	8896.62	326.93	2864.19	328.76	398.38	447.63	115.37	381.77	140.82	1066.53
21	2012-10-19	0	0	1	1	1	1	0	0	0		0	0	0	0	0		0	1	0	0		0.333333	187.86	111.1	645.41	4669.62	127.89	1237.54	273.02	224.04	272.24	81.71	428.81	99.64	806.36
22	2011-11-02	0	0	0	1	0	1	0	1	0		0.333333	0	0	1	0		0.333333	1	0	0		0.333333	149.33	223.08	1020.5	8868.55	531.23	2093.72	507.83	994.61	1118.99	149.7	266.62	156.79	1151.1
23	2010-08-16	0	0	0	0	0	0	0	0	0		0	0	0	0	0		0	1	1			1	120.96	125.25	315.39	1225.11	83.99	1562.86	97.55	156.86	195.2	50.23	839.53	120.86	918.53
24	2011-01-25	0	0	1	0	0	1	0	0			0	0	0	0			0						197.69	70.82	400.39	10393.8	259.01	1714.13	345.27	338.92	324.89	159.41	208.13	75.62	731.54
27	2010-06-11	0	0	0	0	0	0	0	1	1		0.666667	1	0	0	1		0.333333	1	1	1		1	221.93	148.96	1685.06	5406.18	404.17	3164.97	302.71	294.83	465.54	127.18	651.65	165.18	1198.25
28	2013-05-08	0	0	0	0	0	0	90	70	90		83.3333	90	30	5	20		18.3333	2	1			1.5	3551.03	2372.11	1814.39	14876.1	411.33	8701.7	967.77	1379.02	1629.63	352.21	1934.68	306.67	4607.36
29	2012-01-13	0	1	0	0	0	0	0	0	0		0	0	0	0	0		0	2	1	2		1.66667	126.39	141.36	5019.07	11158.9	545.4	18529.5	497.36	519.95	534.22	1830.66	813.33	182.36	2722.4
30	2013-11-26	0	0	0	1	0	1	60	70	20		50	60	80	5	50		45	0	1	1		0.666667	1034.11	391.06	881.75	4015.66	266.94	1683.15	562	1023.94	2131.96	146.56	360.85	159.2	1650.86
31	2012-07-31	0	0	1	0	0	1	20	20	10		16.6667	20	1	10	10		7	0	1	1		0.666667	360.16	237.25	1812.61	6382.58	489.2	5429.65	325.76	465.77	760.14	655.32	763.64	162.94	1616.65
32	2013-10-16	0	0	1	1	0	1	0	0	0		0	0	0	0	0		0	1	1	2		1.33333	190.06	148.2	2120.87	10947.8	760.97	6851.16	488	414.95	478.59	192.07	485.27	160.39	1260.67
33	2012-05-23	0	0	0	0	0	0	5	1	1		2.33333	1	20	5	1		8.66667	0	1	1		0.666667	207.63	170.16	3665.62	18842.9	650.51	6425.87	669.88	650.19	1102.6	565.83	472	160.74	1049.51
34	2006-02-26	0	0	0	1	0	1	0	0	0		0	0	0	0	0		0	0	1	0		0.333333	97.59	94.75	618.63	3224.54	308.71	1418.15	247.39	202.02	183.94	163.52	402.52	116.29	896.23
35	2005-05-10	0	0	0	0	0	0	0	0	0		0	0	0	0	0		0	0	1			0.5	100.38	87.11	350.35	1708.56	149.42	922.95	164.64	125.2	157.56	172.25	153.15	119.13	501.16
36	2005-03-18	0	0	0	0	0	0	0	0	0		0	0	0	0	0		0	1	1	0		0.666667	110.42	121.09	1020.7	5523.7	261.93	2081.25	257.29	145.72	123.88	315.47	313.45	116.41	708.68
37	2004-02-20	0	0	0	0	0	0	0				0	0	0				0	1				1	299.84	204.72	2616.97	5775.91	216.56	4428.92	244.47	304.45	1921.4	109.07	1314	212.67	2052.02
38	2007-10-10	0	0	0	1	0	1	0				0	0	0				0	0				0	94.46	77.42	350.69	1513.82	146.33	1006.35	176	122.41	132.86	70.8	143.47	115.23	466.84
48	2010-02-05	0	0	0	0	0	0	0	0	0		0	0	0	0	0		0	1	1	0		0.666667	169.54	99.25	760.97	5826.46	178	1348.43	183.16	412.8	1130.81	77.99	602.93	133.35	1263.55
49	2011-07-28	0	2	0	0	0	0	0	0	0		0	0	0	0	0		0	1	1	1		1	84.72	78.48	1869.2	15335.4	537.57	5220.93	557.57	842.03	773.47	501.09	1221.58	162.66	3092.04
50	2010-10-25	0	0	0	0	0	0	0	0			0	0	0	0			0	1	1			1	80.32	78.66	1344.33	3181.78	127.02	1284.37	228.7	517.15	360.8	67.72	289.96	133.75	1096.68
51	2002-12-17	0	0	0	0	0	0	0	0			0	0	0	0			0	1	1			1	98.42	72.36	1417.36	8082.56	559.01	8977.64	737.63	1070.74	2658.83	1527.07	694.93	214.37	3217.51
52	2011-10-28	0	3	0	0	0	0																						2690.03	421.06	463.75	2799.9		517.13	178.39	2129.27
53	2012-10-02	0	0	0	0	0	0	85	85	100		90	85	85	0	100		61.6667	0	1			0.5	2880.68	185.29	1236.7	4795.02	335.83	3871.05	460.29	339.1	796.17	644.58	543.46	148.62	1315.02
64	2010-12-03	0	3	1	0	0	1	0	0			0	0	0	0			0	1	1	0		0.666667	171.61	110.39	606.9	2764.27	212.36	1403.04	240.33	458.72	1884.69	116.28	365.74	122.2	857.43
65	2008-01-17	0	3	0	0	0	0	0	0	0		0	0	0	1	1		0.666667	1	1	1		1	146.87	100.2	2136.35	14521.9	504.18	20848.5	418.81	886.63	3701.76	130.67	720.35	192.4	2629.54
67	2015-03-31	0	0	1	0	0	1	25	50	1		25.3333	25	10	5	1		5.33333	1	1	1		1	194.99	131.84	1021.58	12208.8	518.89	2004.1	490.18	657.82	515.2	238.29	1022.78	196.44	2455.19
71	2009-10-02	0	3	0	0	0	0	0	0	0		0	0	0	0	0		0	0	0			0	72.82	49.22				653.49	428.85	152.1	246.83	116	229.35	154.44	3574.83
73	2010-10-10	0	0	1	0	0	1	0	0	0		0	0	0	0	0		0	0	0	0		0	109.02	89.11	684.58	1995.51	265.61	1077.13	237.07	198.59	253.16	64.31	119.78	115.62	683.14
74	2015-09-18	0	0	1	1	1	1	0	0	0		0	0	0	0	1		0.333333	0	1			0.5	76.49	60.9	3309.56	31857.8	465.93	4946.52	177.71	626	1496.08	193.91	94.87	51.16	368.18
75	2013-01-25	0	3	1	0	0	1	0	0	0		0	0	0	0	0		0	0	0	0		0	296.87	116.87	2308.63	17706	1261.08	1557.35	623.07	1157.21	4395.27	144.41	164	130.27	1817.63
76	2013-05-01	0	3	1	0	0	1	0	0	0		0	0	0	0	0		0	1	1	0		0.666667	277.26	176.47	1774.16	7091.4	1005.82	1355.91	514.59	880.72	3892.8	139.7	163.28	181.02	1669.41
77	2013-10-30	0	1	0	0	0	0	10	1	0		3.66667	1	20	25	1		15.3333	3	2	1		2	164.15	242.34	4770.48	20836.5	626.03	18920.6	856.35	854.94	740.98	349.32	1053.35	196.05	2043.3
79	2009-07-30	0	2	0	0	0	0	0	0	0		0	0	0	0	0		0	1	1	0		0.666667	80.2	59.97	1461.54	24585.7	898.09	12188.4	1458.38	718.74	752.31	223.61	612.26	115.71	2280.1
84	2007-08-04	0	0	0	0	0	0	5	1	1		2.33333	1	1	1	1		1	1	1	1		1	99.02	77.78	1363.66	16826.8	322.72	3010.33	228.66	323.81	440.19	204.62	97.47	44.03	313.32
87	2011-09-23	0	3	1	0	0	1	0	0	0		0	0	0	0	5		1.66667	1	0	1		0.666667	109.37	49.72	1533.04	16428.2	1027.63	977.71	111.77	166.86	639.72	200.32	181.13	141.59	7295.99
88	2013-01-25	0	0	0	1	0	1	0	0	0		0	0	0	0	0		0	0	0	1		0.333333	59.38	64.7	1502.44	9242.71	460.94	2435.28	259.99	646.93	1028.56	239.21	342.77	150.2	2289.35
89	2010-10-01	0	0	0	0	0	0	0				0	0	0				0	1				1	72.79	68.83	205.28	869.6	98.08					80.78	154.2	43.6	334.72
91	2010-06-15	0	0	0	0	0	0	0	0	0		0	0	0	0	0		0	0	1	1		0.666667	67.24	61.28	2296.59	10916.7	622.96	1975.29	298.86	498.72	874.31	117.23	262.76	136.54	1715.77
92	2010-11-20	0	0	0	0	0	0	0	0	0		0	0	0	0	0		0	0	1	1		0.666667	136.55	95.56	6568.16	14314.3	340.13	1591.74	428.52	628.82	759.05	165.3	487.66	158.12	1501.2
94	2012-04-20	0	3	0	1	0	1	0	0	0		0	0	0	0	0		0	1	1	1		1	108.29	98.48	1199.52	3880.5	359.05	1156.42	383.53	595.64	6454.6	221.57	104.15	121.05	1202.7
95	2011-05-06	0	0	0	0	0	0	0	0			0	0	0	1	10		3.66667	1	1	2		1.33333	450.11	282.37	8379.31	12571.2	307.3	22375.4	409.23	451.5	3626.31	134.97	1940.84	257.75	4563.04
96	2011-07-29	0	3	0	0	0	0	5	1	1		2.33333	1	1	5	5		3.66667	2	1	1		1.33333	337.95	229.99	2665.7	14089	977.72	7601.43	1088.4	1444.57	4131.35	1169.45	1078.82	243.18	3880.18
97	2011-08-24	0	0	0	0	0	0	10	50	10		23.3333	10	20	1	10		10.3333	1	1	1		1	131.46	64.45	2785.03	16706.9	551.45	2280.42	139.73	276.93	759.19	1023.74	909.05	182.27	4603.66
98	2011-11-07	0	4	0			0	0	0			0	0	0	0			0	1	1	1		1	150.94	122.1	3449.24	9829.33	460.31	4869.09	379.75	471.89	1005.49	372.43	457.06	155.37	1521.58
99	2012-11-19	0	0	0	1	0	1	80	50	80		70	80	10	5	20		11.6667	2	1	1		1.33333	1153	315.25	2790.46	10329.4	613.17	3958.6	531.32	1068.51	2050.85	854.41	984.24	187.96	3294.03
102	2012-01-09	0	0	0	0	0	0	0	0	0		0	0	0	0	1		0.333333	1	1	1		1	98.72	105.64	1230.81	11279.8	249.37	5186.06	298.53	313.81	282.29	630.53	685.51	253.38	3456.43
103	2013-01-22	0	4	0	0	0	0	0	0	0		0	0	0	0	0		0	1	1	1		1	133.14	128.83	1680.96	8367.94	612.78	1460.62	366.8	253.65	496.49	123.15	160.52	139.56	1109.58
2	2009-05-11	1	0	1	1	0	1	25	50	75		50	50	30	5	10		15	1	3	2		2	537.37	232.43	1018.71	16574.8	292.29	13666.3	957.67	280.05	150.28	211.92	945.83	179.24	1822.19
6	2010-08-04	1	4	0	0	0	0	0	1	0		0.333333	0	0	1	1		0.666667	1	1	1		1	70.35	59.71	1456.13	20144.5	553.97	3179.44	287.3	428.82	947.14	191.62	96.03	77.01	441.45
24	2009-08-31	1	0	0	0	0	0	10	0			5	5	50	10			30	2	1			1.5	166.07	215.44	2677.98	13673.8	629.58	22236.4	310.11	680.26	550.57	350.73	700.41	194.57	1898.26
27	2009-06-04	1	0	0	0	0	0	0	0	0		0	0	10	0	1		3.66667	0	0	0		0	138.49	92.42	628.91	5039.75	226.23	2542.92	425.28	457.43	340.46	101.8	502.38	167.57	1388.04
28	2013-06-13	1	0	0	0	0	0	50	90	80		73.3333	80	60	10	10		26.6667	1	2	3		2	2170.29	644.42	5951.75	22710.2	581.53	22541.3	828.58	1183.07	1187.59	747.89	1392.97	213.55	4158.33
48	2009-06-16	1	0	0	0	0	0	0	0	0		0	0	0	0	0		0	1	2	1		1.33333	113.39	89.48	1115.35	11714.8	389.34	5433.96	329.54	278.31	633.96	579.7	359.76	202.03	1547.43
51	2003-04-07	1	0	0	0	0	0	0	0	0		0	0	10	0	1		3.66667	1	1	1		1	93.35	72.59	884.71	9416.71	410.84	4597.21	504.67	442.78	637.8	358.13	578.25	144.62	1852.73
53	2004-10-21	1	0	0	0	0	0	0	0			0	0	0	0	10		3.33333	2	1			1.5	171.7	111.33	1825.85	14790.9	2567.21	8774.46	438.49	376.39	473.31	226.02	459.52	121.28	1500.85
66	2003-07-14	1	0	0	0	0	0																	64.79	79.76									204.78	72.35	689.49
67	2012-03-06	1	0	0	0	0	0	5	0	0		1.66667	0	1	1	1		1	2	1	0		1	149.69	109.11	608.02	4848.41	282.31	3058.78	257.58	189.75	358.34	268.52	216.83	173.17	1271.83
68	2008-05-13	1	0	0	0	0	0	0				0	0	0				0	1	2			1.5	99.55	130.93	21717.8	36765.9	1420.79	51951.8	362.2	382.37	465.74	472.07	721.79	157.05	1925.89
74	2013-01-22	1	0	0	1	0	1	0	0	0		0	0	0	0	1		0.333333	1	1			1	133.08	126.68	2148.77	8399.57	663.4	3020.3	344.69	648.33	823.56	893.67	603.31	193.13	2376.34
99	2012-05-18	1	0	0	0	0	0	70	50	70		63.3333	70	1	1	1		1	1	2			1.5	883.9	370.7	5076.99	12200.1	477.67	2126.57	686.3	927.75	1031.98	654.39	912.55	189.82	2585.06
CTRL 1	2009-07-09	1	0	0	0	0	0	1	0	0		0.333333	0	1	5	5		3.66667	1	1	2		1.33333	83.73	93.85	6755.27	17249.4	612.22	17739.7	323.58	916.74	1006.19	199.63	907.97	187.29	3513.95
CTRL 10	2008-01-22	1	0	0	0	0	0	0	0	1		0.333333	0	1	1	5		2.33333	1	1	3		1.66667	230.5	267.19	9783.73	24677.8	4098.91	32910.1	478.21	496.17	372.71	1339.09	909.97	292.37	5100.68
CTRL 11	2008-12-22	1	2	0	0	0	0	80	20	90		63.3333	80	50	50	30		43.3333	2	2	2		2	1823.92	1236.99	6647.77	59397.9	591.93	56280.1	1656.29	951.13	376.35	292.97	1452.92	281.87	4403.55
CTRL 12	2009-02-02	1	4	0	0	0	0	0	1	0		0.333333	0	10	10	0		6.66667	2	1	1		1.33333	198.51	173.53	1958.61	17833.2	719.81	8944.25	701.06	573.11	861.12	325.16	664.26	228.51	3211.66
CTRL 13	2009-03-11	1	1	0	0	0	0	1	0	0		0.333333	0	10	10	5		8.33333	2	1	1		1.33333	160.17	137.92	3178.92	11917.8	621.32	9279.55	462.91	545.11	585.62	967.83	705.12	213.72	2856.01
CTRL 14	2005-12-09	1	0	0	0	0	0	0	0	0		0	0	0	0	1		0.333333	1	2	1		1.33333	96.5	92.83	3043.48	11369	323.6	13290.3	310.98	275.93	661.72	568.04	833.72	173.71	1702.76
CTRL 15	2009-07-22	1	0	0	0	0	0	0	0	0		0	0	1	10	1		4	1	1	1		1	90.92	94.57	2201.01	14296.8	572.15	13995.3	470.9	471.58	1318.61	568.27	621.62	206.07	2114.85
CTRL 16	2009-07-06	1	0	0	0	0	0	0	0	0		0	0	5	5	1		3.66667	2	1	1		1.33333	90.58	83.05	1922.51	14227.6	1091.29	5809.23	519.45	580.98	396.28	751.02	765.13	214.39	3581.92
CTRL 17	2011-03-24	1	0	0	0	0	0	0	0	1		0.333333	0	0	0	50		16.6667	1	0	1		0.666667	80.7	76.13	2620.31	21409.3	550.57	9151.82	742.61	684.7	612.02	445.03	714.08	182.46	2829.79
CTRL 18	2011-02-22	1	0	0	0	0	0	70	90	90		83.3333	90	25	10	20		18.3333	3	2	2		2.33333	173.45	106.26	4106.32	50950.4	1017.59	27742.5	722.69	570.82	650.11	368.79	917.74	122.35	2317.76
CTRL 19	2006-09-11	1	4	0	0	0	0	0	0	0		0	0	0	0	0		0	0	0	0		0	69.15	49.18	412.05	5699.64	178.28	1503.61	176.51	236.66	220.64	107.3	118	66.86	499.36
CTRL 2	2009-11-10	1	1	0	0	0	0	0	0	0		0	0	0	1	0		0.333333	1	2			1.5	82.06	55.31	3860.84	15695.8	1151.88	5387.33	269.18	622.36	940.94	4698.16	769.72	169.68	3153.54
CTRL 20	2008-02-04	1	1	0	0	0	0	0	0	0		0	0	0	1	0		0.333333	0	1	0		0.333333	76.76	69.75	1357.85	15328.9	620.73	3804.23	935.89	949.93	988.16	698.28	739.7	156.46	2909.32
CTRL 21	2007-01-23	1	2	0	0	0	0	0	0	0		0	0	1	1	0		0.666667	2	1	1		1.33333	105.3	102.58	232.96	2653.27	96.82	2619.81	299.52	236.12	250.54	80.55	703.12	148.6	1385.78
CTRL 22	2007-01-17	1	0	0	1	0	1	0	0	0		0	0	0	0	0		0	1	1	1		1	84.18	82.19	236.46	5384.24	105.13	2210.34	230.85	354.52	638.03	78.06	267.04	105.1	746.42
CTRL 23	2007-06-27	1	1	0	0	0	0	15	25			20	20	1	10			5.5	1	1			1	78.09	64.61	1254.02	23937.1	919.88	4533.12	652.15	785.23	758.49	318.09	481.63	216.76	5261.97
CTRL 24	2004-09-20	1	1	0	0	0	0	25	25	50		33.3333	25	10	10	10		10	3	3	3		3	1804.41	282.92	3333.45	34275.8	1342.96	34599.6	1111.28	488.61	625.24	1196.39	1134.19	240.32	4397.14
CTRL 25	2010-09-01	1	1	0	0	0	0	10	10	80		33.3333	10	5	25	10		13.3333	1	2	1		1.33333	883.41	318.61	1545.95	25308	429.98	10508.7	755.04	1117.29	1410.08	953.77	838.75	207.46	2630.77
CTRL 26	2006-01-06	1	0	0	0	0	0	0	1	0		0.333333	0	1	5	1		2.33333	1	1	0		0.666667	174.48	167.75	1636.5	18126.3	403.72	6451.59	384.32	384.42	517.71	1170.33	503.79	202.49	2013.41
CTRL 27	2006-11-21	1	1	0	0	0	0	0	0			0	0	0	0			0	1	1			1	73.8	77.03	120.81	1213.14	54.75	1343.36	127.62	242.61	260.84	49.44	305.68	108.04	843.17
CTRL 28	2008-07-10	1	1	0	0	0	0	50				50	50	5				5	2				2	141.79	99.13	4926.16	31011.2	3046.83	23357.1	547.35	424.97	738.37	936.81	503.84	210.82	2340.25
CTRL 3	2009-12-01	1	0	0	0	0	0	0	0	0		0	0	0	0	0		0	0	1	0		0.333333	78.7	79.77	1380.56	8013.1	315.23	1869.74	518.82	563.75	486.19	108.26	1014.27	223.74	2190.49
CTRL 4	2009-04-14	1	0	0	0	0	0	75	10	10		31.6667	10	10	20	1		10.3333	1	1	1		1	346.38	258.55	3297.97	21464.2	582.67	33954.4	702.17	573.6	407.5	860.29	1070.82	228.3	2600.65
CTRL 5	2009-03-31	1	0	0	0	0	0	0	0	0		0	0	0	1	1		0.666667	1	1	1		1	115.7	129.31	6284.87	20850.7	552.45	15634.8	448.56	414.33	526.04	743.16	811.63	207.57	1925.25
CTRL 6	2009-09-22	1	2	0	0	0	0	0	0	0		0	0	0	0	0		0	0	0	0		0	112.4	88.59	607.91	3169.87	314.67	1634.47	528.47	231.3	265.86	105.5	160.97	138.47	1154.85
CTRL 7	2011-03-16	1	0	0	0	0	0	0	5	0		1.66667	0	5	10	1		5.33333	3	1	1		1.66667	144.38	191.8	3011.21	17018.3	1180.97	11708	448.89	378.69	379	575.38	819.15	209.49	2773.09
CTRL 8	2009-05-06	1	4	0	0	0	0	5	1	1		2.33333	1	10	25	1		12	2	2	3		2.33333	182.23	235.03	5960.31	20230.6	973.58	21472.6	535.66	393.36	476.67	573.49	1183.63	306.7	5837.49
CTRL 9	2009-05-07	1	0	0	0	0	0	1	1	0		0.666667	1	10	10	1		7	3	1	1		1.66667	143.04	213.8	4984.24	14156.6	2044.44	13143.2	411.91	422.04	667.87	352.7	749.85	217.7	2549.82

## Sheet: Suppl 3
Supplementary Data 3 - Tissue Characteristics (per microarray spot)
Patient_ID	Sample #	Tumor PDL1_TPS1	Tumor PDL1_TPS2	Tumor PDL1_TPS3	sPDL1_SPS1	TIL1	TIL2	TIL3	Tissue_site1	Sampling_type	XRT_at_site_before_tissue_obtained	Chemo_Targeted_tx_before_tissue_obtained	Immunotherapy_before_tissue_obtained	Any_pretreatment	Necrosis_present_within_tissue	Tumor PDL1	Stroma PDL1	CD3	CD4	CD8	FOXP3_in_CD4	Tim3_in_CD3	PD1_in_CD3	Lag3_in_CD3	Granzyme_B_in_CD3	Ki67_in_Tumor	Ki67_in_CD3
1	131	100	90	100	10	0	1	1	0	1	1	0	0	1	0	1108.73	201.655	2542.13	895.424	3176.61	92.3379	535.064	1953.01	193.569	1128.68	400.998	666.956
1	138	100	90	100	10	0	1	1	0	1	1	0	0	1	0	1796.7	568.124	3409.28	965.833	4545.11	789.987	758.547	2392.3	194.982	728.82	845.766	833.68
1	145	100	90	100	10	0	1	1	0	1	1	0	0	1	0	2428.79	325.398	4045.32	943.382	5185.41	266.165	580.178	3801.28	204.348	806.372	1028.48	1101.05
2	124	25	50	75	30	1	3	2	1	1	1	1	0	1	0	151.876	91.8349	4542.71	415.955	4133.45	94.494	728.907	1373.87	160.855	1000.7	127.439	284.049
2	117	25	50	75	30	1	3	2	1	1	1	1	0	1	0	402.163	170.901	13840	953.177	13479.6	189.501	984.371	1968.02	179.918	747.472	158.481	228.162
2	110	25	50	75	30	1	3	2	1	1	1	1	0	1	0	1058.08	434.568	22616.4	495.763	14199.7	351.765	1124.22	2124.66	196.942	1124.84	164.907	327.935
2	380	0	0	0	0	0	3	0	0	1	0	0	0	0	0	52.0499	38.8989	1582.21	854.268	2777.36	118.301	295.896	1713.64	149.086	592.909	2261.56	1364.18
2	387	0	0	0	0	0	3	0	0	1	0	0	0	0	0	53.4676	55.4717	508.467	1377.29	5957.79	204.67	540.353	2102.51	163.716	40.914	176.594	214.042
2	394	0	0	0	0	0	3	0	0	1	0	0	0	0	0	121.986	66.4308	447.214	947.342	1618.06	87.9908	307.998	1486.81	115.406	55.4725	88.8978	92.1408
3	291	0	0		0	1	1		0	1	0	0	0	0	0	131.049	117.824	590.051	451.112	1503.22	48.1387	955.22	880.204	103.051	122.523	1929.67	397.435
3	284	0	0		0	1	1		0	1	0	0	0	0	0	179.637	128.409	778.654	521.264	1180.13	70.3702	431.745	991.254	119.541	102.687	292.702	186.043
3	277	0	0		0	1	1		0	1	0	0	0	0	0	155.249	0	-1	1609.19	4932.19	169.985	-1	-1	-1	-1	-1	-99
4	301	0			1	1			0	1	1	0	0	1	1	254.02	244.274	14514.2	3793.12	9429.83	602.137	613.997	4288.26	212.549	764.483	1152.23	1538.52
4	217	0			1	1	1		0	0	1	0	0	1	1	599.278	645.821	-1	1166.55	8641.5	1221.28	772.435	2972.74	315.699	-1	-1	-99
4	308	0			1	1			0	1	1	0	0	1	1	237.198	196.623	6195.48	1254.51	6131.85	100.897	-1	-1	-1	324.466	172.726	163.853
4	315	0			1	1			0	1	1	0	0	1	1	455.92	153.34	-1	399.826	576.595	90.6766	-1	-1	-1	-1	-1	-99
5	330	0	0	0	0	1	1	0	0	0	0	0	0	0	0	156.643	156.095	4621.14	1009.29	1623.95	185.447	668.89	1458.65	289.551	423.972	260.816	644.35
5	246								0	0	1	0	0	1	0	-1	-1	-1	-1	-1	-1	-1	-1	-1	-1	-1	-99
5	323	0	0	0	0	1	1	0	0	0	0	0	0	0	0	151.868	135.077	4925.28	1521.19	2489.41	132.501	1382.58	1284.26	151.272	471.454	180.045	354.15
5	239								0	0	1	0	0	1	0	-1	-1	-1	-1	-1	-1	-1	-1	-1	-1	-1	-99
5	316	0	0	0	0	1	1	0	0	0	0	0	0	0	0	124.992	113.021	3586.5	834.186	1773.4	312.965	700.835	1426.85	169.463	444.035	159.045	354.653
5	232								0	0	1	0	0	1	0	-1	-1	-1	-1	-1	-1	-1	-1	-1	-1	-1	-99
6	2	0	1	0	0	1	1	1	1	1	0	0	0	0	0	69.0623	61.2699	1897.3	664.26	1572.37	123.922	105.711	634.076	80.7266	368.142	707.444	431.824
6	9	0	1	0	0	1	1	1	1	1	0	0	0	0	0	73.6649	59.9038	5939.21	1215.18	4135.3	278.204	99.9551	366.643	82.3596	74.4399	2037.15	770.414
6	16	0	1	0	0	1	1	1	1	1	0	0	0	0	0	68.3305	57.9607	1701.8	671.485	1891.38	172.725	82.437	323.634	67.9289	419.331	96.8353	84.2143
6	294	0	0	0	0	0	1	1	0	1	0	0	0	0	0	92.4128	70.3165	1051.34	690.221	766.497	86.731	187.251	808.636	149.032	450.564	2219.68	1479.06
6	287	0	0	0	0	0	1	1	0	1	0	0	0	0	0	125.609	95.5977	911.476	470.92	1014.11	60.2704	184.891	768.607	129.87	243.316	1794.98	749.899
6	280	0	0	0	0	0	1	1	0	1	0	0	0	0	0	173.157	114.918	2248.2	462.995	772.388	54.1395	710.456	1258.4	152.19	199.032	1921.74	389.724
7	256	0	0	0	0	1	1	1	0	1	0	0	0	0	0	73.7597	64.6431	2857.72	901.835	1573.67	89.6977	479.254	1483.92	176.951	238.439	484.356	270.327
7	263	0	0	0	0	1	1	1	0	1	0	0	0	0	0	115.525	121.961	2392.01	815.784	2890.86	80.5714	467.298	1577.83	197.554	238.041	1048.97	491.696
7	270	0	0	0	0	1	1	1	0	1	0	0	0	0	0	103.477	114.066	1948.25	740.356	2007.27	87.5807	358.825	1180.42	174.808	204.338	600.675	327.705
8	254	0	0	0	20	0	1	0	0	1	1	1	0	1	1	160.573	140.633	9934.93	996.914	4163.67	211.053	711.186	2145.61	233.619	706.456	1531.91	1044.12
8	261	0	0	0	20	0	1	0	0	1	1	1	0	1	1	281.881	875.749	21550.3	1431.5	8445.56	264.177	522.76	1608.63	206.972	595.643	1409.76	1095.1
8	268	0	0	0	20	0	1	0	0	1	1	1	0	1	1	173.642	214.435	3196.64	914.49	3727.7	147.306	332.927	1055.86	155.629	422.404	1649.4	863.338
8	414	0			0	1			0	1	1	0	0	1	1	95.2604	45.2632	396.75	1994.48	2024.34	1217.41	152.683	2121.9	136.697	102.507	156.019	213.29
8	407	0			0	1			0	1	1	0	0	1	1	79.8215	82.7259	-1	2088.45	1937	524.202	167.237	3359.97	157.842	-1	-1	-99
8	400	0			0	1			0	1	1	0	0	1	1	67.9782	37.2445	2775.63	266.638	297.47	74.1915	-1	-1	-1	807.4	137.914	149.439
9	215	10	5	1	0	2	1	1	0	1	0	0	0	0	0	136.431	102.686	21272.2	1668.95	5704.81	522.112	849.406	2317.47	202.996	302.647	544.613	345.809
9	222	10	5	1	0	2	1	1	0	1	0	0	0	0	0	270.914	182.326	4710.23	1244.06	2080.84	166.596	638.068	1741.26	179.083	252.947	574.848	418.823
9	229	10	5	1	0	2	1	1	0	1	0	0	0	0	0	236.048	148.186	5651.98	1143.04	2918.65	812.833	716.105	1730.33	168.648	333.795	595.158	303.875
11	249	5	1	1	10	2	1	1	0	1	0	0	0	0	0	114.323	119.433	34546.1	2223.26	11104.9	1206.29	1381.43	3801.77	289.708	482.624	619.579	706.072
11	242	5	1	1	10	2	1	1	0	1	0	0	0	0	0	368.421	493.18	15651.5	1839.32	5578.34	457.637	1608.9	3352.98	264.392	446.404	537.827	638.517
11	235	5	1	1	10	2	1	1	0	1	0	0	0	0	0	516.888	644.09	29496.4	2498.22	6562.8	268.766	1450.8	3774.39	281.813	521.975	429.528	616.408
12	214	0	0		0	1			0	1	1	1	0	1	1	73.9252	81.6277	1306.56	920.439	1425.66	69.9794	290.283	643.505	116.325	284.811	244.955	160.961
12	221	0	0		0	1			0	1	1	1	0	1	1	133.02	122.344	1871.43	1125.59	1089.94	64.8059	366.69	562.189	105.629	590.546	124.157	126.538
12	228	0	0		0	1			0	1	1	1	0	1	1	-1	-1	-1	1553.48	1131.4	109.889	-1	-1	-1	-1	-1	-99
13	379	0	0	0	0	0	0		0	1	0	0	0	0	0	55.6003	51.5136	2051.23	1318.42	2127.59	191.195	813.353	2228.96	166.966	320.971	1903.4	2366.8
13	386	0	0	0	0	0	0		0	1	0	0	0	0	0	111.217	83.892	-1	1713.94	2469.02	260.362	1022.28	8543.11	332.738	-1	-1	-99
13	393	0	0	0	0	0	0		0	1	0	0	0	0	0	172.306	152.748	655.917	2563.02	3447.05	234.804	867.524	2581.69	188.497	37.2374	78.8188	87.446
14	207	0	1		0	1	1		0	1	0	0	0	0	0	131.412	101.216	14460	773.763	8626.77	79.5788	811.776	1675.43	191.777	657.152	204.411	250.823
14	200	0	1		0	1	1		0	1	0	0	0	0	0	212.942	142.383	1953.27	890.999	1787.92	80.1176	524.328	1477.17	206.448	140.577	106.302	110.023
14	193	0	1		0	1	1		0	1	0	0	0	0	0	158.239	192.238	23696.8	672.684	11850.3	117.807	1123.32	1961.56	162.256	696.815	217.044	272.203
15	208								1	0	1	1	0	1	0	-1	-1	-1	-1	-1	-1	-1	-1	-1	-1	-1	-99
15	43	100	100	100	10	1	1	0	0	1	1	0	0	1	1	1063.85	319.768	2279.27	930.007	1730.03	106.171	755.219	989.246	56.0334	483.911	517.761	307.268
15	50	100	100	100	10	1	1	0	0	1	1	0	0	1	1	510.986	110.777	1980.5	1114.2	2815.48	260.048	308.751	853.242	125.628	842.624	436.65	691.333
15	57	100	100	100	10	1	1	0	0	1	1	0	0	1	1	431.459	137.527	2291.12	1075.06	3149.73	241.45	287.519	838.24	111.652	695.68	526.982	740.932
16	126	0	20		0	0			0	1	1	0	0	1	0	88.5272	69.1666	1310.13	624.798	795.791	360.433	502.053	731.025	123.333	274.899	116.242	113.126
16	119	0	20		0	0			0	1	1	0	0	1	0	216.294	112.651	1027.92	569.17	792.076	119.246	599.392	1017.58	172.81	144.672	99.4955	95.7161
16	112	0	20		0	0			0	1	1	0	0	1	0	226.781	138.403	1443.31	834.677	1109.28	81.6611	719.929	1543.11	179.777	271.55	471.412	208.747
17	206	0	0		0	1	0		0	1	1	1	0	1	0	110.587	80.0681	1416.21	915.475	1430.06	78.0919	557.601	947.991	141.924	699.701	535.582	682.024
17	199	0	0		0	1	0		0	1	1	1	0	1	0	175.26	177.476	2113.76	835.587	1012.18	79.8534	567.739	992.992	169.974	360.147	218.815	181.707
17	192	0	0		0	1	0		0	1	1	1	0	1	0	116.539	0	1564	728.965	1003.24	54.6941	365.645	621.242	131.564	142.605	168.651	118.889
18	88	0	0	0	0	0	0	1	0	1	1	1	0	1	0	112.361	77.5667	1323.65	973.824	1539.23	170.205	142.478	743.383	124.49	303.085	2214.79	268.45
18	95	0	0	0	0	0	0	1	0	1	1	1	0	1	0	206.45	113.52	1029.65	907.405	1325.4	90.1737	133.715	806.066	122.278	306.849	1386.35	413.474
18	102	0	0	0	0	0	0	1	0	1	1	1	0	1	0	125.799	93.4667	1242.83	684.527	985.093	98.1234	165.582	965.525	120.676	394.541	2252.85	593.679
19	168	0	0		25	1	1		0	1	0	0	0	0	0	86.3121	78.1394	8175.51	1612.15	9014.64	309.387	650.977	2580.83	256.406	669.455	1925.93	1563.61
19	161	0	0		25	1	1		0	1	0	0	0	0	0	-1	-1	-1	-1	-1	-1	-1	-1	-1	-1	-1	-99
19	154	0	0		25	1	1		0	1	0	0	0	0	0	-1	-1	17217.9	-1	-1	-1	-1	-1	-1	737.524	2061.51	1481.92
20	122	0	0	0	0	1	1	1	0	1	0	0	0	0	0	83.2199	70.3938	3050.76	1018.28	1428.5	68.942	291.229	874.735	129.853	229.19	207.489	167.947
20	115	0	0	0	0	1	1	1	0	1	0	0	0	0	0	144.63	116.466	2748.25	1161.06	1902.16	158.725	445.134	903.144	143.361	390.824	552.547	472.624
20	108	0	0	0	0	1	1	1	0	1	0	0	0	0	0	138.649	160.765	2793.56	1456.27	1968.44	118.436	408.952	1421.72	149.243	366.254	582.853	554.566
21	372	0	0	0	0	1	0	0	0	1	1	1	1	1	1	72.9649	43.1695	2087.99	950.201	1246.3	91.9496	385.899	700.839	96.4128	464.473	470.445	357.909
21	288	0	0	0	0	1	1	1	0	1	0	1	1	1	0	133.533	122.949	1145.09	847.793	1370.94	187.504	248.735	1081.74	236.755	320.683	472.317	329.207
21	365	0	0	0	0	1	0	0	0	1	1	1	1	1	1	299.076	154.918	387.095	1025.55	1283.64	99.8396	572.924	854.555	92.7482	81.5577	74.0383	90.176
21	281	0	0	0	0	1	1	1	0	1	0	1	1	1	0	114.483	102.179	883.596	624.444	923.171	61.9366	214.785	506.49	136.09	139.564	146.452	154.475
21	358	0	0	0	0	1	0	0	0	1	1	1	1	1	1	191.541	135.208	-99	286.945	266.449	53.3507	327.619	863.679	109.755	-99	-99	-99
21	274	0	0	0	0	1	1	1	0	1	0	1	1	1	0	64.2079	57.7035	1081.26	643.116	1211.19	105.226	244.244	663.358	121.081	194.206	177.873	161.835
22	172	0	1	0	0	1	0	0	0	1	0	1	0	1	1	108.472	143.943	2551.12	982.92	3844.05	280.798	147.372	786.918	181.926	576.614	1202.39	1247.03
22	179	0	1	0	0	1	0	0	0	1	0	1	0	1	1	197.786	343.334	1858.91	924.963	2148.11	86.6907	416.252	1269.8	140.184	551.096	1128.33	1246.96
22	186	0	1	0	0	1	0	0	0	1	0	1	0	1	1	141.732	181.963	1871.13	858.571	1643.32	81.6199	236.248	1396.58	148.252	395.782	1026.26	489.843
23	210	0	0	0	0	1	1		0	1	0	0	0	0	0	74.9526	86.8046	1916.46	354.931	278.54	52.0682	618.485	764.157	120.446	114.418	180.416	159.969
23	203	0	0	0	0	1	1		0	1	0	0	0	0	0	162.759	165.776	1751.09	379.404	463.133	51.4954	1200.81	1246.29	147.59	92.419	200.218	162.706
23	196	0	0	0	0	1	1		0	1	0	0	0	0	0	125.172	123.168	1021.03	482.503	898.955	47.1319	699.304	745.134	94.5426	85.8096	204.951	147.919
24	171	10	0		50	2	1		1	0	0	0	0	0	0	102.02	97.1844	28170.8	1580.85	20926	738.013	663.62	2007.97	201.502	341.343	592.018	913.939
24	178	10	0		50	2	1		1	0	0	0	0	0	0	218.724	341.264	33195.5	1692.51	8298.89	220.431	711.128	2357.59	210.761	296.705	700.445	708.584
24	185	10	0		50	2	1		1	0	0	0	0	0	0	177.464	207.858	5342.76	951.779	8355.46	93.7404	726.479	1329.21	171.439	292.277	359.244	418.267
25	420								0	1	0	0	0	0	0	-1	-1	-1	-1	-1	-1	-1	-1	-1	-1	-1	-99
25	413								0	1	0	0	0	0	0	-1	-1	-1	-1	-1	-1	-1	-1	-1	-1	-1	-99
25	406								0	1	0	0	0	0	0	-1	-1	-1	-1	-1	-1	-1	-1	-1	-1	-1	-99
27	333	0	0	0	10	0	0	0	1	1	0	0	0	0	0	91.3683	63.4796	2570.43	775.889	2397.84	108.261	547.194	1327.42	185.69	437.653	443.612	551.359
27	326	0	0	0	10	0	0	0	1	1	0	0	0	0	0	158.519	83.7175	2100.61	716.649	1803.79	85.2439	377.646	1228.37	156.212	423.368	327.529	326.384
27	319	0	0	0	10	0	0	0	1	1	0	0	0	0	0	165.591	130.07	2957.7	574.498	1289.01	111.891	582.297	1608.35	160.804	414.824	250.24	494.556
27	170	0	1	1	0	1	1	1	0	1	0	0	0	0	0	121.994	85.6725	2152.45	893.298	1545.5	123.405	548.132	1037.94	160.906	439.926	468.31	288.897
27	177	0	1	1	0	1	1	1	0	1	0	0	0	0	0	278.345	164.537	4669.79	918.521	1532.62	133.124	561.851	1186.68	162.52	213.541	428.181	278.534
27	184	0	1	1	0	1	1	1	0	1	0	0	0	0	0	265.449	196.659	2672.66	1057.75	2875.6	125.007	844.963	1370.11	172.107	254.657	500.139	317.049
28	340	50	90	80	60	1	2	3	1	1	0	0	0	0	0	320.195	96.6597	7784.44	1039.53	5622.88	278.488	1494.2	3868.44	198.645	1056.6	1796.45	1529.61
28	175	0			0	1			1	0	0	0	0	0	0	312.799	238.871	-1	1406.6	4586.06	135.32	-1	-1	-1	-1	-1	-99
28	347	50	90	80	60	1	2	3	1	1	0	0	0	0	0	3445.42	1011.54	13859.2	1444.44	9827.31	355.636	1455.85	3367.27	200.862	713.211	638.194	1023.56
28	182	0			0	1			1	0	0	0	0	0	0	-1	-1	-1	-1	-1	-1	-1	-1	-1	-1	-1	-99
28	354	50	90	80	60	1	2	3	1	1	0	0	0	0	0	2745.25	825.05	45980.2	2541.67	17537.3	1609.56	1228.87	5239.28	241.157	715.914	1128.12	996.039
28	209	90	70	90	30	2	1		0	0	0	0	0	0	0	1527.58	504.458	13050.6	1088.18	11171.8	582.814	2330.6	2873.59	260.149	1170.78	2202.54	2166.73
28	202	90	70	90	30	2	1		0	0	0	0	0	0	0	5574.48	4239.77	4352.75	1682.29	3469.14	121.608	848.78	3677.03	297.176	764.757	1056.72	591.324
28	195	90	70	90	30	2	1		0	0	0	0	0	0	0	-1	-1	-1	-1	-1	-1	2624.66	7271.46	362.697	-1	-1	-99
29	335	0	0	0	0	2	1	2	0	1	0	0	0	0	0	84.4044	76.0303	31768.4	1843.73	8192.74	1124.89	948.643	3413.48	229.103	544.818	792.497	632.106
29	328	0	0	0	0	2	1	2	0	1	0	0	0	0	0	143.898	181.405	5928.33	1489.48	3036.73	583.989	639.483	1850	152.073	558.137	466.661	556.317
29	321	0	0	0	0	2	1	2	0	1	0	0	0	0	0	150.86	166.655	17891.7	3037.64	6819.14	3783.09	851.853	2903.73	165.917	389.131	343.496	371.418
30	44								1	0	0	1	0	1	1	-1	-1	-1	-1	-1	-1	-1	-1	-1	-1	-1	-99
30	51								1	0	0	1	0	1	1	-1	-1	-1	-1	-1	-1	-1	-1	-1	-1	-1	-99
30	58								1	0	0	1	0	1	1	-1	-1	-1	-1	-1	-1	-1	-1	-1	-1	-1	-99
30	336	60	70	20	80	0	1	1	0	0	0	1	0	1	1	509.904	171.188	1579.24	1100.96	2413.22	128.68	383.941	1467.68	153.016	663.207	4855.41	1190.83
30	329	60	70	20	80	0	1	1	0	0	0	1	0	1	1	1165.23	610.924	1611.63	963.263	1459.26	122.426	268.42	1334.64	148.804	557.73	375.669	401.778
30	322	60	70	20	80	0	1	1	0	0	0	1	0	1	1	1427.18	0	1858.57	410.318	754.241	188.562	430.192	2150.26	175.795	465.051	1164.79	1479.21
31	173	20	20	10	1	0	1	1	0	1	1	0	0	1	1	150.567	115.653	4481.32	1049.98	3131.24	949.368	718.517	2022.15	185.72	368.479	541.682	616.057
31	180	20	20	10	1	0	1	1	0	1	1	0	0	1	1	531.242	410.313	4897.03	937.144	2377.79	257.596	734.784	1491.87	156.696	353.329	920.402	299.12
31	187	20	20	10	1	0	1	1	0	1	1	0	0	1	1	398.665	185.77	6910.6	1305.13	2738.05	759.007	837.609	1335.93	146.393	255.469	818.346	482.135
32	212	0	0	0	0	1	1	2	0	1	1	1	0	1	0	127.595	92.0756	1613.31	1088.23	1836.58	91.2008	342.464	910.285	135.285	645.645	588.959	401.433
32	219	0	0	0	0	1	1	2	0	1	1	1	0	1	0	224.546	175.509	2200.85	1087.07	1403.45	87.3499	260.377	910.9	138.233	527.699	613.917	499.585
32	226	0	0	0	0	1	1	2	0	1	1	1	0	1	0	218.036	177.012	16739.3	1242.46	14837	397.665	852.979	1960.82	207.645	290.66	232.901	343.846
33	211	5	1	1	20	0	1	1	0	1	0	0	0	0	0	113.371	80.1545	4463.62	2634.2	5545.93	608.547	405.945	842.121	132.605	476.856	1217.39	888.624
33	218	5	1	1	20	0	1	1	0	1	0	0	0	0	0	317.305	263.436	10923.3	1462.88	7083.93	417.272	390.877	926.127	176.175	655.583	877.217	470.201
33	225	5	1	1	20	0	1	1	0	1	0	0	0	0	0	192.226	166.901	3890.68	1115.44	9260.2	671.684	619.164	1380.27	173.439	877.188	1213.2	591.744
34	165	0	0	0	0	0	1	0	0	1	0	1	0	1	1	77.4437	70.5817	1746.26	754.151	1678.15	131.866	609.118	1000.5	125.027	238.059	190.956	199.358
34	158	0	0	0	0	0	1	0	0	1	0	1	0	1	1	110.134	109.737	1245.22	720.28	1239.8	231.769	391.732	919.93	117.601	222.899	190.647	238.034
34	151	0	0	0	0	0	1	0	0	1	0	1	0	1	1	105.206	103.938	1262.97	650.28	961.23	126.93	206.698	768.253	106.243	281.211	170.223	168.667
35	381								1	0	0	0	0	0	0	-1	-1	-1	-1	-1	-1	-1	-1	-1	-1	-1	-99
35	388								1	0	0	0	0	0	0	-1	-1	-1	-1	-1	-1	-1	-1	-1	-1	-1	-99
35	395								1	0	0	0	0	0	0	-1	-1	-1	-1	-1	-1	-1	-1	-1	-1	-1	-99
35	252	0	0	0	0	0	1		0	0	0	0	0	0	1	66.4156	56.7113	900.056	765.288	931.238	394.737	120.715	425.038	106.783	210.061	132.141	125.361
35	245	0	0	0	0	0	1		0	0	0	0	0	0	1	113.921	97.0014	953.859	650.743	936.161	63.3937	120.643	589.461	141.363	179.394	221.509	145.393
35	238	0	0	0	0	0	1		0	0	0	0	0	0	1	120.816	107.608	914.922	806.522	1231.8	58.6056	218.083	488.981	109.245	104.459	119.039	104.835
36	130	0	0	0	0	1	1	0	0	1	0	0	0	0	0	81.1785	80.1814	1528.47	806.679	1135.03	248.175	234.11	608.657	113.903	254.297	104.122	117.866
36	137	0	0	0	0	1	1	0	0	1	0	0	0	0	0	119.618	126.336	3147.13	852.415	1572.45	585.901	492.168	751.752	124.507	204.36	140.008	182.464
36	144	0	0	0	0	1	1	0	0	1	0	0	0	0	0	130.457	156.767	1568.14	782.282	1196.61	112.32	214.059	765.625	110.825	313.204	127.502	136.816
37	123	0			0	1			0	0	0	0	0	0	0	-1	-1	-1	-1	-1	-1	-1	-1	-1	-1	-1	-99
37	116	0			0	1			0	0	0	0	0	0	0	-1	-1	-1	-1	-1	-1	-1	-1	-1	-1	-1	-99
37	109	0			0	1			0	0	0	0	0	0	0	299.838	204.722	4428.93	1071.55	4315.8	109.07	1314	2052.01	212.671	244.469	1921.4	304.454
38	253	0			0	0			0	1	0	1	0	1	0	66.2041	54.4805	1006.35	858.247	793.168	69.7963	143.468	466.839	115.231	176.003	132.863	122.406
38	260	0			0	0			0	1	0	1	0	1	0	120.936	100.36	-1	1116.84	974.704	83.8135	-1	-1	-1	-1	-1	-99
38	267	0			0	0			0	1	0	1	0	1	0	96.2368	0	-1	1048.11	740.102	58.7784	-1	-1	-1	-1	-1	-99
48	292	0	0	0	0	1	2	1	1	0	0	0	0	0	0	85.7428	69.9978	5394.57	961.773	6070.71	351.888	413.381	1371.64	191.398	321.227	441.98	284.865
48	285	0	0	0	0	1	2	1	1	0	0	0	0	0	0	146.99	106.149	5623.45	1030.3	6427.79	489.385	384.263	1972.36	196.137	372.56	542.299	257.256
48	278	0	0	0	0	1	2	1	1	0	0	0	0	0	0	107.429	92.3048	5283.86	919.716	5695.3	897.813	281.639	1298.29	218.555	294.841	917.6	292.823
48	127	0	0	0	0	1	1	0	0	0	0	0	0	0	0	111.9	63.3869	676.858	507.207	876.104	66.2137	206.488	561.29	97.0752	154.286	1232.22	218.549
48	134	0	0	0	0	1	1	0	0	0	0	0	0	0	0	138.102	143.908	2435.82	910.875	6173.43	106.087	1136.49	2489.15	198.244	210.646	727.495	604.514
48	141	0	0	0	0	1	1	0	0	0	0	0	0	0	0	258.63	90.4499	932.611	613.146	842.022	61.6693	465.82	740.209	104.719	184.544	1432.73	415.332
49	378	0	0	0	0	1	1	1	0	1	0	0	0	0	0	56.3292	38.4627	4272.97	1229.82	7654.29	661.813	1375.98	3391.6	178.765	756.126	1154.14	1397.21
49	371	0	0	0	0	1	1	1	0	1	0	0	0	0	0	80.8236	48.811	3250.91	1213.9	4120.39	593.402	863.542	2463.86	140.47	798.407	1081.93	1032.22
49	364	0	0	0	0	1	1	1	0	1	0	0	0	0	0	116.995	148.175	8138.9	1358.64	6946.98	248.05	1425.22	3420.68	168.742	118.163	84.3255	96.672
50	338	0	0		0	1	1		0	1	0	0	0	0	0	50.3119	40.9071	1236.68	903.958	1936.73	78.3225	109.652	1321.28	117.091	264.559	325.216	184.007
50	345	0	0		0	1	1		0	1	0	0	0	0	0	79.5344	100.932	1332.05	825.751	1447.08	67.3357	270.759	1033	148.408	192.836	396.379	850.301
50	352	0	0		0	1	1		0	1	0	0	0	0	0	111.104	94.1381	-1	404.278	428.67	57.5108	489.481	935.766	135.745	-1	-1	-99
51	83	0	0	0	10	1	1	1	1	1	0	0	0	0		103.84	77.2332	4194.2	968.987	2878.1	260.408	692.465	2408.35	85.376	512.997	637.002	495.943
51	76	0	0	0	10	1	1	1	1	1	0	0	0	0		80.2621	68.6405	6136.03	1025.43	5581.14	667.273	541.123	1859.94	203.629	499.391	567.777	370.873
51	69	0	0	0	10	1	1	1	1	1	0	0	0	0		95.9556	71.8996	3461.39	905.707	2257.64	146.718	501.163	1289.91	144.841	501.627	708.616	461.526
51	337	0	0		0	1	1		0	1	0	0	0	0	0	98.4164	72.3571	9614.06	661.121	1246.6	1800.79	871.03	3276	215.065	633.085	2361.32	814.536
51	344	0	0		0	1	1		0	1	0	0	0	0	0	-1	-1	8341.22	1268.53	3118.73	1253.34	518.825	3159.03	213.679	842.18	2956.33	1326.95
51	351	0	0		0	1	1		0	1	0	0	0	0	0	-1	-1	-1	-1	-1	-1	-1	-1	-1	-1	-1	-99
52	80	0			0				0	1	0	0	0	0	0	-1	-1	-1	-1	-1	-1	-1	-1	-1	-1	-1	-99
52	73	0			0				0	1	0	0	0	0	0	-1	-1	2690.03	-1	-1	-1	517.131	2129.27	178.393	421.062	2799.9	463.751
52	66	0			0				0	1	0	0	0	0	0	-1	-1	-1	-1	-1	-1	-1	-1	-1	-1	-1	-99
53	41	0	0		0	2	1		1	1	0	0	0	0	0	111.051	99.3355	10818.7	1337.98	5517.4	255.479	218.097	896.602	44.9904	384.425	307.321	278.341
53	34	0	0		0	2	1		1	1	0	0	0	0	0	232.352	123.333	5006.59	1139.56	5735.44	258.436	454.402	2344.97	155.98	398.338	336.869	325.567
53	27	0	0		0	2	1		1	1	0	0	0	0	0	-1	-1	10498.1	2377.36	3221.42	164.16	706.057	1260.97	162.855	532.709	775.739	525.264
53	295	85	85	100	85	0	1		0	1	0	0	0	0	0	917.277	114.32	1222.73	1515.36	1073.73	91.0262	257.728	1091.67	140.836	310.046	353.97	300.224
53	302	85	85	100	85	0	1		0	1	0	0	0	0	0	2073.57	256.252	6954.29	1781.73	1842.65	1750.24	1096.98	2058.02	162.795	365.036	1907.38	545.75
53	309	85	85	100	85	0	1		0	1	0	0	0	0	0	5651.19	0	3436.12	1936.14	1430.02	92.4813	275.676	795.372	142.225	705.796	127.167	171.338
64	343	0	0	0	0	2			0	0	0	0	0	0	0	150.937	89.6393	-1	1072.93	1285.95	158.511	-1	-1	-1	-1	-1	-99
64	259	0	0		0	1	1	0	0	1	1	0	0	1	1	235.673	144.057	832.537	759.765	1070.34	66.6377	245.084	950.322	125.298	246.178	2763.25	588.608
64	350	0	0	0	0	2			0	0	0	0	0	0	0	285.155	0	-1	-1	-1	-1	-1	-1	-1	-1	-1	-99
64	266	0	0		0	1	1	0	0	1	1	0	0	1	1	168.251	128.171	1973.54	942.215	1057.44	218.1	666.736	945.298	123.349	234.474	1006.14	328.838
64	357	0	0	0	0	2			0	0	0	0	0	0	0	-1	-1	-99	-1	-1	-1	-1	-1	-1	-99	-99	-99
64	273	0	0		0	1	1	0	0	1	1	0	0	1	1	110.912	58.9514	-1	682.811	870.168	64.1	185.409	676.678	117.944	-1	-1	-99
65	81	0	0	0	0	1	1	1	0	0	0	0	0	0	0	245.021	109.762	12465	1253.92	3270.16	141.62	839.239	2306.55	189.663	369.475	2477.74	772.163
65	74	0	0	0	0	1	1	1	0	0	0	0	0	0	0	122.331	107.366	2442.13	1117.91	2686.71	180.159	512.281	2932.83	184.119	667.882	6269.04	1653.51
65	67	0	0	0	0	1	1	1	0	0	0	0	0	0	0	73.2478	83.4682	47638.4	724.51	2210.85	70.236	809.537	2649.24	203.404	219.084	2358.5	234.215
66	7								1	1	0	0	0	0	0	-1	-1	-1	-1	-1	-1	-1	-1	-1	-1	-1	-99
66	14								1	1	0	0	0	0	0	-1	-1	-1	-1	-1	-1	-1	-1	-1	-1	-1	-99
66	21								1	1	0	0	0	0	0	64.7881	79.762	-1	-1	-1	-1	204.777	689.486	72.3521	-1	-1	-99
67	250	5	0	0	1	2	1	0	1	1	0	0	0	0	0	97.5598	79.9306	4746.44	888.495	5336.96	563.303	261.523	1608.6	168.158	250.211	298.413	207.691
67	243	5	0	0	1	2	1	0	1	1	0	0	0	0	0	184.896	133.219	2862.42	844.202	2242.74	149.667	-1	-1	-1	254.912	458.007	197.229
67	236	5	0	0	1	2	1	0	1	1	0	0	0	0	0	166.623	114.192	1567.49	1001.2	1676.5	92.5779	172.127	935.055	178.185	267.624	318.605	164.344
67	85	25	50	1	10	1	1	1	0	1	1	0	0	1	1	84.4332	67.0468	2210.9	1384.29	3201.8	507.877	2601.38	5239.61	289.1	514.751	809.504	1265.55
67	92	25	50	1	10	1	1	1	0	1	1	0	0	1	1	304.806	195.751	1729.71	1187.6	1687.76	106.615	256.977	1007.23	149.777	474.234	294.047	342.508
67	99	25	50	1	10	1	1	1	0	1	1	0	0	1	1	195.725	132.73	2071.69	1313.85	1844.98	100.387	209.978	1118.73	150.456	481.568	442.063	365.397
68	36	0			0	1	2		1	1	0	0	0	0	0	73.9532	89.3932	51951.8	3796.35	7419.63	370.816	637.109	2548.36	192.174	362.195	465.742	382.37
68	29	0			0	1	2		1	1	0	0	0	0	0	124.433	213.183	-1	8438.48	34817.3	869.113	740.086	2218.39	198.247	-1	-1	-99
68	22	0			0	1	2		1	1	0	0	0	0	0	100.262	90.2217	-1	3940.57	14508.7	176.266	788.168	1010.93	80.7288	-1	-1	-99
71	415	0	0	0	0	0	0		0	1	0	0	0	0	0	75.9457	39.826	546.483	-1	-1	-1	195.46	5669.67	204.305	180.966	114.691	186.827
71	408	0	0	0	0	0	0		0	1	0	0	0	0	0	69.5241	56.8511	-1	1230.31	1652.1	159.961	237.978	3436.32	143.272	-1	-1	-99
71	401	0	0	0	0	0	0		0	1	0	0	0	0	0	73.0034	50.9963	760.491	570.736	1282.74	72.0401	254.613	1618.49	115.73	676.736	378.967	117.382
73	251	0	0	0	0	0	0	0	0	1	1	0	0	1	0	83.2031	68.8251	950.3	702.576	874.083	65.661	132.984	658.466	126.245	245.693	295.34	193.642
73	244	0	0	0	0	0	0	0	0	1	1	0	0	1	0	134.355	108.726	1159.98	779.984	1135.07	69.9701	113.823	770.067	104.163	262.79	240.552	204.454
73	237	0	0	0	0	0	0	0	0	1	1	0	0	1	0	109.494	89.7891	1121.11	683.146	1016.45	57.3083	112.518	620.881	116.444	202.716	223.575	197.679
73	385	0	0	0	0	0	1	0	0	1	0	0	0	0	0	52.1897	42.8154	1027.25	339.657	354.624	68.661	317.298	821.203	107.346	166.204	1104.15	839.133
73	392	0	0	0	0	0	1	0	0	1	0	0	0	0	0	53.8015	48.1739	334.871	337.978	309.586	52.9909	1261.72	1354.22	138.78	53.7182	75.3882	89.9267
73	399	0	0	0	0	0	1	0	0	1	0	0	0	0	0	73.7859	50.3266	1494.81	301.587	326.337	81.6436	776.268	1398.77	115.546	169.565	173.06	278.544
74	166	0	0	0	0	1	1		1	1	0	1	0	1	0	82.397	67.6441	2620.84	1187.89	2821.15	333.725	527.294	1883.32	176.185	290.204	737.091	550.461
74	159	0	0	0	0	1	1		1	1	0	1	0	1	0	143.469	147.434	2644.49	1028.95	2026.76	976.472	665.569	1853.58	190.148	285.918	555.924	485.697
74	152	0	0	0	0	1	1		1	1	0	1	0	1	0	173.38	164.962	3795.56	1882.82	2721.24	1370.82	617.067	3392.12	213.046	457.95	1177.66	908.834
74	1	0	0	0	0	0	1		0	1	1	1	1	1	1	94.5904	66.3166	4133.82	727.014	3576.79	211.054	126.399	505.033	39.7888	360.905	2340.48	1028.66
74	8	0	0	0	0	0	1		0	1	1	1	1	1	1	70.584	76.2846	9962.63	1107.82	12694.9	100.031	98.7334	371.057	74.4675	62.0247	2065.88	781.154
74	15	0	0	0	0	0	1		0	1	1	1	1	1	1	64.3036	40.1028	743.094	1550.39	1777.69	270.631	59.4784	228.455	39.2091	110.198	81.8665	68.1887
75	46	0	0	0	0	0	0	0	0	1	1	0	0	1	0	263.202	110.497	1367.43	1372.07	1939.69	161.784	144.724	1772.58	111.05	510.887	4330.53	613.721
75	53	0	0	0	0	0	0	0	0	1	1	0	0	1	0	276.825	119.479	1617.87	1339.43	1931.88	143.427	168.502	1571.88	121.631	580.728	3815.37	806.427
75	60	0	0	0	0	0	0	0	0	1	1	0	0	1	0	350.568	120.635	1686.75	1286.74	1513.23	128.026	178.769	2108.43	158.118	777.6	5039.92	2051.49
76	167	0	0	0	0	1	1	0	0	1	1	0	0	1	1	207.796	109.831	1539.48	1323.6	1638.83	147.73	190.187	1784.99	161.099	645.332	3195.59	773.071
76	160	0	0	0	0	1	1	0	0	1	1	0	0	1	1	403.45	193.131	1284.74	1083.73	1400.32	174.903	133.994	1962.52	227.981	549.405	4051.78	1147.19
76	153	0	0	0	0	1	1	0	0	1	1	0	0	1	1	220.525	226.452	1243.49	1078.45	1175.53	96.4676	165.669	1260.74	153.993	349.026	4431.03	721.898
77	164	10	1	0	20	3	2	1	0	1	0	0	0	0	0	154.261	160.295	36673.8	2885.26	12933.8	512.864	1218.58	2610.99	234.25	884.344	633.633	600.755
77	157	10	1	0	20	3	2	1	0	1	0	0	0	0	0	175.246	338.11	13427.1	1173.49	11607.9	304.65	1119.58	1662.29	196.34	860.864	809.291	898.202
77	150	10	1	0	20	3	2	1	0	1	0	0	0	0	0	162.937	228.619	6660.8	1162.26	4883.98	230.454	821.899	1856.62	157.553	823.857	780.007	1065.86
79	39	0	0	0	0	1	1	0	0	1	0	0	0	0	0	83.534	87.0987	23320.7	1598.03	14064.2	307.136	860.838	3216.57	83.4467	776.713	593.39	622.704
79	32	0	0	0	0	1	1	0	0	1	0	0	0	0	0	86.2642	48.6959	3761.16	1306.17	5995.34	98.0696	500.11	1362.59	150.15	1008.07	428.901	530.103
79	25	0	0	0	0	1	1	0	0	1	0	0	0	0	0	70.7916	44.111	9483.44	1185.71	3976.38	265.62	475.83	2261.14	113.521	2590.35	1234.62	1003.4
83	5								0	0	0	0	0	0	0	-1	-1	-1	-1	-1	-1	-1	-1	-1	-1	-1	-99
83	12								0	0	0	0	0	0	0	-1	-1	-1	-1	-1	-1	-1	-1	-1	-1	-1	-99
83	19								0	0	0	0	0	0	0	-1	-1	-1	-1	-1	-1	-1	-1	-1	-1	-1	-99
84	4	5	1	1	1	1	1	1	0	1	0	0	0	0	0	101.493	87.0499	5271.83	1194.2	2980.97	284.238	94.623	292.987	34.0784	428.706	798.011	540.705
84	11	5	1	1	1	1	1	1	0	1	0	0	0	0	0	70.5798	65.5029	748.833	1262.16	2497.86	191.431	121.829	404.94	49.8601	28.6082	82.3701	106.915
84	18	5	1	1	1	1	1	1	0	1	0	0	0	0	0	124.997	80.7857	-1	1622.7	5919	138.179	75.9689	242.034	48.1406	-1	-1	-99
87	416	0	0	0	0	1	0	1	0	1	1	0	0	1	0	63.9059	45.5637	1496.69	1495.5	3055.56	253.424	173.428	10327.4	154.264	137.701	1713.81	292.038
87	409	0	0	0	0	1	0	1	0	1	1	0	0	1	0	69.2697	47.542	359.56	1178.87	1815.44	118.419	207.785	4225.95	117.215	68.1449	101.424	109.281
87	402	0	0	0	0	1	0	1	0	1	1	0	0	1	0	194.946	56.0657	1076.89	530.555	784.548	229.114	162.18	7334.64	153.295	129.475	103.931	99.261
88	383	0	0	0	0	0	0	1	0	1	0	1	0	1	0	45.5358	41.463	3491.13	1060.48	2181.74	263.177	434.086	2570.16	163.964	378.906	2217.1	1469.08
88	390	0	0	0	0	0	0	1	0	1	0	1	0	1	0	53.4451	53.5071	356.066	1063.8	1702.21	234.85	415.187	2435.56	153.9	51.8008	73.1878	87.0123
88	397	0	0	0	0	0	0	1	0	1	0	1	0	1	0	79.16	99.1315	3458.63	1149.17	1786.67	219.616	179.042	1862.34	132.734	349.252	795.39	384.71
89	38	0			0	1			0	1	0	0	0	0	0	72.7856	68.8348	-1	785.244	952.379	80.7817	154.195	334.721	43.6037	-1	-1	-99
89	31	0			0	1			0	1	0	0	0	0	0	-1	-1	-1	-1	-1	-1	-1	-1	-1	-1	-1	-99
89	24	0			0	1			0	1	0	0	0	0	0	-1	-1	-1	-1	-1	-1	-1	-1	-1	-1	-1	-99
91	374	0	0	0	0	0	1	1	0	1	0	0	0	0	0	45.9629	36.0311	1465.61	1443.39	2490.85	113.564	200.068	1527.49	134.016	400.213	1702.75	1030.13
91	367	0	0	0	0	0	1	1	0	1	0	0	0	0	0	51.1724	43.9155	421.677	1143.23	2790.31	101.376	208.795	1763.22	117.561	36.9238	70.9484	77.1509
91	360	0	0	0	0	0	1	1	0	1	0	0	0	0	0	104.589	103.901	4038.59	1359.35	3421.18	136.756	379.428	1856.59	158.052	459.457	849.243	388.869
92	341	0	0	0	0	0	1	1	0	0	0	0	0	0	0	61.6016	45.7736	1749.06	1544.12	2273.04	162.312	197.884	1720.21	162.822	464.728	1101.45	948.373
92	348	0	0	0	0	0	1	1	0	0	0	0	0	0	0	123.788	145.343	764.451	1469.59	10498.9	184.389	988.377	1495.81	168.492	431.262	494.18	437.859
92	355	0	0	0	0	0	1	1	0	0	0	0	0	0	0	224.25	0	2261.72	2274.76	2326.58	149.185	276.704	1287.59	143.06	389.556	681.505	500.221
94	296	0	0	0	0	1	1	1	0	1	0	1	0	1	0	70.8646	67.9534	1179.05	1336.22	1660.54	342.237	115.574	1717.97	137.088	445.324	8820.2	673.57
94	303	0	0	0	0	1	1	1	0	1	0	1	0	1	0	104.671	102.685	785.829	370.642	262.543	68.5793	95.8176	524.943	106.633	278.418	6003.77	490.116
94	310	0	0	0	0	1	1	1	0	1	0	1	0	1	0	149.328	124.792	1504.39	475.336	639.512	253.908	101.072	1365.19	119.42	426.863	4539.83	623.22
95	169	0	0		0	1	1	2	0	1	0	0	0	0	0	106.507	110.874	4811.92	723.963	8916.33	94.4443	1862.13	2049.76	205.819	315.236	8563.51	452.624
95	176	0	0		0	1	1	2	0	1	0	0	0	0	0	176.839	153.986	9131.68	0	0	96.046	1558.18	2888.75	215.28	278.369	1683.22	445.531
95	183	0	0		0	1	1	2	0	1	0	0	0	0	0	1067	582.238	53182.6	3056.72	11575.4	214.414	2402.21	8750.6	352.139	634.073	632.183	456.347
96	332	5	1	1	1	2	1	1	0	1	0	0	0	0	0	237.686	147.16	4506.58	1396.25	8554.18	2566.32	1106.66	4163.55	264.084	1187.05	2382.75	1496.82
96	325	5	1	1	1	2	1	1	0	1	0	0	0	0	0	304.467	243.581	7589.91	1325.24	5720.64	517.448	1144.74	3560.69	230.303	1038.79	4449.72	1314.91
96	318	5	1	1	1	2	1	1	0	1	0	0	0	0	0	471.685	299.243	10707.8	1154.68	4940.12	424.58	985.046	3916.29	235.163	1039.35	5561.58	1521.98
97	129								1	0	0	0	0	0	0	-1	-1	-1	-1	-1	-1	-1	-1	-1	-1	-1	-99
97	136								1	0	0	0	0	0	0	-1	-1	-1	-1	-1	-1	-1	-1	-1	-1	-1	-99
97	419	10	50	10	20	1	1	1	0	1	0	0	0	0	0	115.993	58.6174	6061.73	1116.76	4464.67	573.239	992.859	4000.88	200.5	279.043	1814.52	600.498
97	412	10	50	10	20	1	1	1	0	1	0	0	0	0	0	104.16	51.166	334.7	1150.82	2778.81	212.219	580.427	3597.22	149.162	52.3792	201.646	108.779
97	405	10	50	10	20	1	1	1	0	1	0	0	0	0	0	174.232	83.5706	444.818	2445.44	6298.8	2285.76	1153.88	6212.86	197.136	87.7666	261.396	121.501
98	299	0	0		0	1	1	1	0	1	0			0	0	99.4743	87.6269	3975.25	1234.83	3764.3	602.951	532.228	1812.52	168.543	455.807	1034.77	533.854
98	306	0	0		0	1	1	1	0	1	0			0	0	155.27	136.395	4816.02	1628.87	5540.19	221.052	358.631	1155.27	143.795	291.737	659.711	327.491
98	313	0	0		0	1	1	1	0	1	0			0	0	198.07	142.29	5816	1147.48	3642.22	293.301	480.32	1596.94	153.784	391.694	1321.98	554.328
99	87	70	50	70	1	1	2		1	0	0	0	0	0	0	-1	-1	-1	-1	-1	-1	-1	-1	-1	-1	-1	-99
99	94	70	50	70	1	1	2		1	0	0	0	0	0	0	798.589	298.221	1444.48	1660.63	2683.58	144.094	791.768	2104.82	186.577	329.74	1057.5	438.599
99	101	70	50	70	1	1	2		1	0	0	0	0	0	0	969.21	443.183	2808.66	2431.54	2422.92	1164.69	1033.33	3065.29	193.068	1042.87	1006.45	1416.9
99	377	80	50	80	10	2	1	1	0	1	0	1	0	1	0	483.289	114.947	3871.47	1753.2	3284.14	1816.16	1022.63	3415.91	182.884	659.14	3567.18	1500.14
99	370	80	50	80	10	2	1	1	0	1	0	1	0	1	0	881.324	233.117	2491.15	1226.55	2046.4	333.255	761.394	1779.76	153.508	412.051	1259.07	799.427
99	363	80	50	80	10	2	1	1	0	1	0	1	0	1	0	2094.38	597.684	5513.19	1357.34	5513.32	413.802	1168.69	4686.4	227.484	522.762	1326.29	905.977
102	257	0	0	0	0	1	1	1	0	0	0	0	0	0	0	86.7617	81.8523	6653.81	913.541	7281.16	1161.19	706.572	5338.67	315.699	370.529	303.789	321.998
102	264	0	0	0	0	1	1	1	0	0	0	0	0	0	0	112.231	121.083	4531.78	967.624	6061.61	131.77	651.214	2291.43	205.513	275.906	272.426	241.853
102	271	0	0	0	0	1	1	1	0	0	0	0	0	0	0	97.175	113.982	4372.6	737.466	4350.19	598.643	698.751	2739.21	238.939	249.157	270.65	377.58
103	248	0	0	0	0	1	1	1	0	1	0	0	0	0	0	109.49	78.4757	1324.42	982.519	1436.15	87.2007	159.443	1027.17	138.403	430.549	563.953	215.841
103	241	0	0	0	0	1	1	1	0	1	0	0	0	0	0	165.643	191.878	1614.15	1192.84	2394.79	105.443	165.325	859.382	131.225	319.168	338.064	194.658
103	234	0	0	0	0	1	1	1	0	1	0	0	0	0	0	124.288	116.144	1443.27	807.604	1146.35	176.803	156.783	1442.2	149.061	350.688	587.457	350.463
CTRL 1	384	1	0	0	1	1	1	2	1	1	0	0	0	0	0	70.5997	56.8745	17453.3	2523.45	7331.08	248.573	718.529	2635.6	169.659	474.395	2533.48	2224.45
CTRL 1	391	1	0	0	1	1	1	2	1	1	0	0	0	0	0	73.2546	78.3648	349.728	1629.1	3372.24	123.609	921.894	3265.94	174.999	51.7408	95.8136	107.53
CTRL 1	398	1	0	0	1	1	1	2	1	1	0	0	0	0	0	107.336	146.309	35416.1	2384.87	10089.1	226.701	1083.47	4640.3	217.225	444.598	389.28	418.257
CTRL 10	205	0	0	1	1	1	1	3	1	1	0	0	0	0	0	218.506	252.139	46326.6	3606.98	12215.3	2112.53	1090.68	4688.6	297.885	516.375	227.819	475.12
CTRL 10	198	0	0	1	1	1	1	3	1	1	0	0	0	0	0	199.511	327.553	5648.86	1354.67	6865.2	353.332	653.543	2008.59	216.886	390.334	343.686	361.109
CTRL 10	191	0	0	1	1	1	1	3	1	1	0	0	0	0	0	273.493	221.887	46754.9	3376	15120.6	1551.42	985.673	8604.84	362.334	527.934	546.61	652.29
CTRL 11	174	80	20	90	50	2	2	2	1	1	0	0	0	0	0	1573.38	1409.13	61553.8	1423.54	45254.7	233.105	1390.52	4383.71	292.093	1748.2	262.865	895.719
CTRL 11	181	80	20	90	50	2	2	2	1	1	0	0	0	0	0	1870.25	1899.35	53225.6	1484.1	39963.8	134.198	1327.05	3071.57	268.527	1510.06	281.899	760.509
CTRL 11	188	80	20	90	50	2	2	2	1	1	0	0	0	0	0	2028.12	402.484	54061.1	1858.19	43772.6	511.604	1641.2	5755.36	284.985	1710.6	584.294	1197.17
CTRL 12	163	0	1	0	10	2	1	1	1	1	0	0	0	0	0	173.999	130.529	10839.1	1007.69	6263.66	384.094	673.247	2930.49	221.508	622.261	980.039	550.108
CTRL 12	156	0	1	0	10	2	1	1	1	1	0	0	0	0	0	218.616	225.744	11335.6	896.76	3178.33	417.612	593.389	2870.13	249.77	531.782	769.627	507.172
CTRL 12	149	0	1	0	10	2	1	1	1	1	0	0	0	0	0	202.909	164.322	4658.04	1028.26	3095.91	173.783	726.143	3834.36	214.254	949.141	833.691	662.059
CTRL 13	132	1	0	0	10	2	1	1	1	1	0	0	0	0	0	124.496	100.021	11017.3	2071.3	3637.38	1505.47	919.244	3179.01	239.972	518.862	588.48	478.109
CTRL 13	139	1	0	0	10	2	1	1	1	1	0	0	0	0	0	155.503	133.753	6496.51	1136.23	3074.98	636.421	439.908	1424.49	161.11	345.101	365.973	585.136
CTRL 13	146	1	0	0	10	2	1	1	1	1	0	0	0	0	0	200.514	179.982	10324.8	2716.26	3254.25	761.602	756.197	3964.54	240.091	524.765	802.396	572.091
CTRL 14	121	0	0	0	0	1	2	1	1	1	0	0	0	0	0	88.5064	81.2732	8153.71	980.101	3634.37	263.651	642.091	1380.87	190.153	274.838	1257.71	295.794
CTRL 14	114	0	0	0	0	1	2	1	1	1	0	0	0	0	0	103.751	101.714	12136.5	1443.74	5344.96	638.471	728.332	1190.16	147.511	249.978	502.917	244.356
CTRL 14	107	0	0	0	0	1	2	1	1	1	0	0	0	0	0	97.2437	95.5015	19580.7	1055.29	5163.76	802.013	1130.72	2537.25	183.456	408.12	224.545	287.627
CTRL 15	90	0	0	0	1	1	1	1	1	1	0	0	0	0	0	99.5088	97.4713	8000.64	932.928	4683.89	436.112	676.945	1508.44	209.133	445.842	1005.6	499.182
CTRL 15	97	0	0	0	1	1	1	1	1	1	0	0	0	0	0	86.6547	87.2346	13378.7	915.837	4605.06	549.759	607.908	1742.84	196.253	449.82	1314.45	395.057
CTRL 15	104	0	0	0	1	1	1	1	1	1	0	0	0	0	0	86.5896	99.0078	20606.5	989.677	5343.03	718.926	580.018	3093.27	212.837	517.048	1635.77	520.487
CTRL 16	79	0	0	0	5	2	1	1	1	1	0	0	0	0	0	110.304	104.62	4684.54	1375.23	2635.33	954.898	450.164	1772.52	180.249	431.934	527.476	608.276
CTRL 16	72	0	0	0	5	2	1	1	1	1	0	0	0	0	0	81.3883	74.6362	8105.35	1642.12	2959.56	595.998	1019.71	4429.32	260.538	568.691	313.894	569.391
CTRL 16	65	0	0	0	5	2	1	1	1	1	0	0	0	0	0	80.0516	69.8887	4637.81	1653.38	2027.39	702.161	825.512	4543.91	202.37	557.711	347.483	565.26
CTRL 17	48	0	0	1	0	1	0	1	1	1	0	0	0	0	0	95.9795	88.2834	6879.48	1239.5	7116.75	944.847	714.294	1270.87	150.89	680.75	284.293	427.181
CTRL 17	55	0	0	1	0	1	0	1	1	1	0	0	0	0	0	63.5286	56.6592	4772.89	1048.92	2551.39	186.714	460.757	1264.01	150.159	622.168	576.963	473.775
CTRL 17	62	0	0	1	0	1	0	1	1	1	0	0	0	0	0	82.5884	83.4599	15803.1	1579.37	8799.3	203.524	967.194	5954.51	246.323	924.926	974.81	1153.13
CTRL 18	37	70	90	90	25	3	2	2	1	1	0	0	0	0	0	159.606	105.742	37416.1	2307.83	22687.7	430.058	1298.49	3114.21	121.549	1121.51	1018.08	992.261
CTRL 18	30	70	90	90	25	3	2	2	1	1	0	0	0	0	0	148.063	98.299	44928	2376.22	20635.8	380.639	1321.76	3295.95	183.911	963.475	857.595	644.525
CTRL 18	23	70	90	90	25	3	2	2	1	1	0	0	0	0	0	212.677	114.741	883.234	1941.38	27715.8	295.679	132.983	543.112	61.603	83.0792	74.6654	75.6606
CTRL 19	6	0	0	0	0	0	0	0	1	1	0	0	0	0	0	72.1985	48.9768	3476.7	492.944	1008.71	95.21	101.928	324.199	67.8239	364.664	423.031	476.191
CTRL 19	13	0	0	0	0	0	0	0	1	1	0	0	0	0	0	70.9395	56.9506	564.435	708.479	1210.89	88.987	115.477	320.484	56.5413	47.3059	123.979	113.152
CTRL 19	20	0	0	0	0	0	0	0	1	1	0	0	0	0	0	64.3234	41.614	469.682	455.5	769.845	137.692	136.61	853.4	76.2042	117.572	114.91	120.634
CTRL 2	373	0	0	0	0	1	2		1	1	0	0	0	0	0	59.364	46.1031	10286.2	2303.93	4662.93	4377.22	733.999	3301.96	172.865	512.965	1809.76	1169.35
CTRL 2	366	0	0	0	0	1	2		1	1	0	0	0	0	0	104.76	64.5122	488.44	1966.34	3680.53	5019.1	805.435	3005.13	166.504	25.4021	72.1182	75.3768
CTRL 2	359	0	0	0	0	1	2		1	1	0	0	0	0	0	-1	-1	-99	-1	-1	-1	-1	-1	-1	-99	-99	-99
CTRL 20	84	0	0	0	0	0	1	0	1	1	0	0	0	0	0	78.423	77.3435	3995.97	951.376	6831.53	880.693	846.475	4744.27	74.2364	919.701	1155.18	1160.65
CTRL 20	77	0	0	0	0	0	1	0	1	1	0	0	0	0	0	80.4683	68.403	3268.94	970.115	4845.58	607.695	829.216	2025.08	210.422	1032.02	654.208	640.875
CTRL 20	70	0	0	0	0	0	1	0	1	1	0	0	0	0	0	71.3891	63.4934	4147.78	967.532	5456.78	606.465	543.41	1958.6	184.722	855.957	1155.1	1048.25
CTRL 21	89	0	0	0	1	2	1	1	1	1	0	0	0	0	0	105.438	101.004	2077.83	653.339	2614.99	94.2982	686.969	1390.99	154.427	318.597	244.348	235.263
CTRL 21	96	0	0	0	1	2	1	1	1	1	0	0	0	0	0	112.187	106.191	2470.19	407.088	1886.08	72.2398	613.475	1128.35	128.686	241.623	249.913	214.981
CTRL 21	103	0	0	0	1	2	1	1	1	1	0	0	0	0	0	98.2724	100.552	3311.42	594.998	1948.87	75.0971	808.93	1638	162.685	338.348	257.371	258.11
CTRL 22	47	0	0	0	0	1	1	1	1	1	0	1	0	1	0	89.8476	90.1245	2573.36	474.824	1718.78	78.2552	264.111	654.985	104.299	181.983	605.041	254.146
CTRL 22	54	0	0	0	0	1	1	1	1	1	0	1	0	1	0	82.2942	82.2031	2097.03	516.045	1276.05	88.3028	184.943	686.058	91.6795	203.608	566.03	284.153
CTRL 22	61	0	0	0	0	1	1	1	1	1	0	1	0	1	0	80.4105	74.2563	1960.62	436.706	1124.15	67.6261	352.076	898.215	119.317	306.973	743.018	525.272
CTRL 23	49	15	25		1	1	1		1	1	0	0	0	0	0	82.7774	65.2382	3641.93	1373.6	4266.41	255.096	428.367	2212.63	172.635	698.874	726.986	788.623
CTRL 23	63	15	25		1	1	1		1	1	0	0	0	0	0	73.4046	63.9838	5424.31	1407.09	4732.04	381.088	534.893	8311.32	260.888	605.435	789.994	781.833
CTRL 24	339	25	25	50	10	3	3	3	1	1	0	0	0	0	0	613.204	137.635	39780	2010.19	25655.6	1731.03	1220.39	4879.81	266.719	1229.45	935.99	678.065
CTRL 24	346	25	25	50	10	3	3	3	1	1	0	0	0	0	0	1650.9	279.974	35084.7	2144.97	25071.2	1345.51	1171.9	4931.71	246.93	1058.86	558.854	451.792
CTRL 24	353	25	25	50	10	3	3	3	1	1	0	0	0	0	0	3149.14	431.145	28934.1	1329.67	17710.2	512.647	1010.3	3379.89	207.325	1045.55	380.877	335.966
CTRL 25	290	10	10	80	5	1	2	1	1	1	0	0	0	0	0	454.707	215.759	11138	978.059	7131.06	1225.45	839.131	2531.99	200.508	708.325	1352.33	1254.47
CTRL 25	283	10	10	80	5	1	2	1	1	1	0	0	0	0	0	678.486	356.673	14873.2	1096.57	11884.5	1018.86	969.424	2775.81	210.271	803.698	1432.07	923.199
CTRL 25	276	10	10	80	5	1	2	1	1	1	0	0	0	0	0	1517.03	383.395	5514.93	1172.3	5676.31	617.001	707.692	2584.5	211.588	753.106	1445.84	1174.21
CTRL 26	201	0	1	0	1	1	1	0	1	1	0	0	0	0	0	234.66	241.098	11890.2	1379.64	14187.4	396.657	529.822	2569.49	232.966	436.472	777.608	490.074
CTRL 26	224	0	1	0	1	1	1	0	1	1	0	0	0	0	0	151.778	138.838	4340.18	765.397	9133.07	1142.86	575.358	1793.07	188.649	389.941	572.545	402.986
CTRL 26	194	0	1	0	1	1	1	0	1	1	0	0	0	0	0	137.004	123.312	3124.34	672.924	6271.87	1971.48	406.199	1677.68	185.851	326.541	202.965	260.204
CTRL 27	143	0	0		0	1	1		1	1	0	0	0	0	0	91.8528	108.334	1120.14	388.503	999.192	46.6792	373.869	938.257	119.761	106.518	254.048	261.897
CTRL 27	231	0	0		0	1	1		1	1	0	0	0	0	0	62.9206	65.262	1098.16	416.192	1134.36	50.8637	272.189	852.072	99.019	164.873	224.354	210.502
CTRL 27	189	0	0		0	1	1		1	1	0	0	0	0	0	66.6206	57.5034	1811.78	424.245	1200.23	50.7775	270.967	739.194	105.325	111.463	304.13	255.443
CTRL 28	147	50			5	2			1	1	0	0	0	0	0	193.24	133.68	38261.3	3014.9	19518.1	1096.65	736.845	3439.13	221.897	573.161	457.845	391.656
CTRL 28	148	50			5	2			1	1	0	0	0	0	0	90.3418	64.5881	8452.76	1215.85	13686.8	776.975	270.828	1241.37	199.739	521.535	1018.9	458.278
CTRL 3	342	0	0	0	0	0	1	0	1	1	0	0	0	0	0	63.4309	64.9078	3096	970.783	2820.06	94.105	493.365	1690.68	154.07	570.173	668.295	665.594
CTRL 3	349	0	0	0	0	0	1	0	1	1	0	0	0	0	0	93.4295	89.0913	643.485	982.83	1918.34	90.3347	1930.16	3319.48	373.904	467.46	304.086	461.911
CTRL 3	356	0	0	0	0	0	1	0	1	1	0	0	0	0	0	79.2346	85.3104	-99	728.596	1543.3	140.332	619.291	1561.31	143.239	-99	-99	-99
CTRL 4	331	75	10	10	10	1	1	1	1	1	0	0	0	0	0	275.622	215.085	47081.4	2317.82	18964	1742.89	1165.96	3543.39	256.555	834.941	548.639	852.162
CTRL 4	324	75	10	10	10	1	1	1	1	1	0	0	0	0	0	401.033	320.619	29962.5	1364.02	11595.3	389.578	1154.59	2241.41	216.771	624.631	368.722	466.553
CTRL 4	317	75	10	10	10	1	1	1	1	1	0	0	0	0	0	362.472	239.948	24819.4	1236.03	9940.8	448.411	891.924	2017.15	211.564	646.951	305.135	402.093
CTRL 5	300	0	0	0	0	1	1	1	1	1	0	0	0	0	0	95.2857	95.3749	12292.8	1172.71	6173.13	408.723	640.264	2050.64	235.789	480.584	590.286	431.695
CTRL 5	307	0	0	0	0	1	1	1	1	1	0	0	0	0	0	123.718	134.268	13477.6	1434.11	8724.9	302.935	747.96	1690.23	190.761	393.808	337.657	343.541
CTRL 5	314	0	0	0	0	1	1	1	1	1	0	0	0	0	0	128.1	158.297	21133.9	2167.42	10398.8	1517.82	1046.67	2034.87	196.154	471.289	650.172	467.758
CTRL 6	289	0	0	0	0	0	0	0	1	1	0	0	0	0	0	110.537	75.6058	1605.75	481.047	574.232	114.374	171.851	1261.96	134.893	612.555	304.656	268.488
CTRL 6	282	0	0	0	0	0	0	0	1	1	0	0	0	0	0	120.901	111.372	1685.58	406.256	457.823	100.252	155.744	1296.44	137.166	495.147	224.853	204.695
CTRL 6	275	0	0	0	0	0	0	0	1	1	0	0	0	0	0	105.774	78.7927	1612.07	801.929	1152.2	101.866	155.311	906.149	143.344	477.696	268.071	220.727
CTRL 7	258	0	5	0	5	3	1	1	1	1	0	0	0	0	0	165.978	248.458	19833.7	2361.4	15513.8	882.837	868.557	4494.76	245.604	437.586	503.88	419.926
CTRL 7	265	0	5	0	5	3	1	1	1	1	0	0	0	0	0	150.641	204.506	10582.1	1159.53	7372.96	693.051	1021.31	2263.19	206.21	421.429	469.863	478.188
CTRL 7	272	0	5	0	5	3	1	1	1	1	0	0	0	0	0	116.516	122.448	4708.08	1123.6	4474.77	150.247	567.598	1561.34	176.658	487.641	163.243	237.943
CTRL 8	247	5	1	1	10	2	2	3	1	0	0	0	0	0	0	158.105	220.098	14105.6	1325.86	5415.18	383.184	1248.81	5024.19	261.567	535.07	329.761	376.134
CTRL 8	240	5	1	1	10	2	2	3	1	0	0	0	0	0	0	185.268	279.935	20273.6	1297.65	5731.85	262.555	1502.06	5735.33	330.734	617.858	481.382	377.104
CTRL 8	233	5	1	1	10	2	2	3	1	0	0	0	0	0	0	203.311	205.072	30038.6	2142.8	14738.5	1074.73	800.024	6752.97	327.802	454.053	618.87	426.837
CTRL 9	216	1	1	0	10	3	1	1	1	1	0	0	0	0	0	145.275	200.56	26037	2039.32	11252.2	407.074	840.654	3622.09	249.674	500.39	402.358	316.385
CTRL 9	223	1	1	0	10	3	1	1	1	1	0	0	0	0	0	164.477	278.264	7644.13	1045.48	3165.98	474.502	723.362	1838.01	196.239	359.004	321.937	319.115
CTRL 9	230	1	1	0	10	3	1	1	1	1	0	0	0	0	0	119.356	162.58	5748.61	852.672	3141.99	176.524	685.522	2189.37	207.173	376.328	1279.3	630.63
